# Supplementary material
Source: PubMed Central journal article supplement (PMC4027739)
Supplement: ml400500e_si_001.pdf [file ml400500e_si_001.pdf]

## Supporting Information

### 2-(2-Arylphenyl)benzoxazole as a Novel Anti-Inflammatory Scaffold: Synthesis and Biological Evaluation

Kapileswar Seth,<sup>a</sup> Sanjeev K. Garg,<sup>a</sup> Raj Kumar,<sup>a</sup> Priyank Purohit,<sup>a</sup> Vachan S. Meena,<sup>b</sup> Rohit Goyal,<sup>c,†</sup>  
Uttam C. Banerjee,<sup>b</sup> Asit K. Chakraborti.<sup>\*a</sup>

<sup>a</sup>Department of Medicinal Chemistry, <sup>b</sup>Department of Pharmaceutical Technology, National Institute of  
Pharmaceutical Education and Research (NIPER), Sector 67, S. A. S. Nagar, Punjab 160 062, India;

<sup>c</sup>Indo-Soviet Friendship (ISF) College of Pharmacy, Moga, 142 001, Punjab, India. <sup>†</sup> Present address:  
Department of Pharmacology, School of Pharmaceutical Sciences, Shoolini University, Solan 173212,  
HP, India.

E-mail: [akchakraborti@niper.ac.in](mailto:akchakraborti@niper.ac.in); [akchakraborti@rediffmail.com](mailto:akchakraborti@rediffmail.com)

#### Table of Contents

|                                                                                                                                                         |   |
|---------------------------------------------------------------------------------------------------------------------------------------------------------|---|
| Evolution of selective COX-2 inhibitors from non-selective COX-2 inhibitors:.....                                                                       | 5 |
| Figure A. Transformation of nonselective cyclooxygenase inhibitor to COX-2 selective agnets in the<br>phenyl propionic acid class. ....                 | 5 |
| Figure B. Transformation of nonselective cyclooxygenase inhibitor to COX-2 selective agnets in the<br>indole-3-acetic acid class. ....                  | 5 |
| Figure C. Transformation of nonselective cyclooxygenase inhibitor diclofenac to COX-2 selective<br>analogue as the most selective COX-2 inhibitor. .... | 6 |
| Figure D. Evolution of the 1,2-diarylheterocycle class (coxibs) selective COX-2 inhibitors from non-<br>selective COX-2 inhibitors. ....                | 6 |
| Determination of Interaction of the Newly Designed Scaffold II in the COX-2 Active Site: .....                                                          | 6 |
| Figure E. Docking pose of 3a representing the new pharmacophoric feature (II) and of Celecoxib on the<br>active site of COX-2 (6COX).....               | 7 |
| Figure F: Comparison of poses of different coxibs with 3a inside the active site of COX-2. ....                                                         | 7 |
| General consideration.....                                                                                                                              | 8 |

|                                                                                                                                                                                                 |    |
|-------------------------------------------------------------------------------------------------------------------------------------------------------------------------------------------------|----|
| Typical procedure for the preparation of 2-(2-bromo-phenyl)-benzoxazole 1 (Ref 6):- .....                                                                                                       | 8  |
| Typical procedure for the conventional Suzuki coupling of 1 with phenylboronic acid 2a to form 2-biphenyl-2-yl-benzoxazole 3a in the presence of Pd catalyst (Scheme 1):- .....                 | 9  |
| Typical procedure for the synthesis of 2'-benzoxazol-2-yl-3-chloro-biphenyl-4-ol 3n (Scheme 2):- .....                                                                                          | 9  |
| Typical procedure for the synthesis of 2-(4'-methanesulfonyl-biphenyl-2-yl)-benzoxazole 3o (Scheme 2):- .....                                                                                   | 10 |
| Characterization of compounds.....                                                                                                                                                              | 10 |
| 2-Biphenyl-2-yl-benzoxazole <sup>7</sup> 3a (Scheme 1):- .....                                                                                                                                  | 10 |
| 2-(4'-Methoxy-biphenyl-2-yl)-benzoxazole 3b (Scheme 1):- .....                                                                                                                                  | 10 |
| 2-(3',4'-Dimethoxy-biphenyl-2-yl)-benzoxazole 3c (Scheme 1):-.....                                                                                                                              | 10 |
| 2-(2',3'-Dimethoxy-biphenyl-2-yl)-benzoxazole 3d (Scheme 1):- .....                                                                                                                             | 11 |
| 2-(3'-Cyclopentyloxy-4'-methoxy-biphenyl-2-yl)-benzoxazole 3e (Scheme 1):- .....                                                                                                                | 11 |
| 2-(4'-Methylsulfonyl-biphenyl-2-yl)-benzoxazole 3f (Scheme 1):-.....                                                                                                                            | 11 |
| 2-(3'-Chloro-4'-methoxy-biphenyl-2-yl)-benzoxazole 3g (Scheme 1):-.....                                                                                                                         | 11 |
| 2-(3'-Chloro-4'-isopropoxy-biphenyl-2-yl)-benzoxazole 3h (Scheme 1):-.....                                                                                                                      | 11 |
| 2-(4'-Benzyloxy-3'-chloro-biphenyl-2-yl)-benzoxazole 3i (Scheme 1):- .....                                                                                                                      | 12 |
| 2-(4'-Fluoro-biphenyl-2-yl)-benzoxazole 3j (Scheme 1):- .....                                                                                                                                   | 12 |
| 2-(4'-Trifluoromethyl-biphenyl-2-yl)-benzoxazole 3k (Scheme 1):-.....                                                                                                                           | 12 |
| 2'-Benzoxazol-2-yl-biphenyl-4-carbaldehyde 3l (Scheme 1):- .....                                                                                                                                | 12 |
| 2'-Benzoxazol-2-yl-biphenyl-4-carbonitrile 3m (Scheme 1):- .....                                                                                                                                | 12 |
| Biology Data .....                                                                                                                                                                              | 13 |
| Cyclooxygenase Inhibition Studies.....                                                                                                                                                          | 13 |
| Carrageenan-Induced Paw Edema Method.....                                                                                                                                                       | 13 |
| Rationalisation of COX-2 selectivity of the novel inhibitors 3g, 3n, and 3o through Computational Studies (3D QSAR) and correlation with the coxibs (Celecoxib, Rofecoxib, and Etoricoxib)..... | 14 |
| Table C: Comparison of benzoxazole derivatives with celecoxib in COX-2 (6COX) .....                                                                                                             | 15 |

|                                                                                                                                                 |    |
|-------------------------------------------------------------------------------------------------------------------------------------------------|----|
| Figure G: Comparison of poses of different coxibs (celecoxib, etoricoxib, rofecoxib) with 3b-3f and 3h-3m inside the active site of COX-2. .... | 21 |
| Figure H: Comparison of interaction poses of 3g, 3n and 3o with celecoxib inside the active site of COX-2. ....                                 | 24 |
| Scanned NMR Spectra.....                                                                                                                        | 25 |
| <sup>1</sup> H NMR of 2-(2-Bromophenyl)-benzoxazole 1:- .....                                                                                   | 25 |
| <sup>13</sup> C NMR of 2-(2-Bromophenyl)-benzoxazole 1:- .....                                                                                  | 25 |
| <sup>1</sup> H NMR of 2-Biphenyl-2-yl-benzoxazole 3a (Scheme 1):-.....                                                                          | 26 |
| <sup>1</sup> H NMR of 2-(4'-Methoxy-biphenyl-2-yl)-benzoxazole 3b (Scheme 1):- .....                                                            | 27 |
| <sup>13</sup> C NMR of 2-(4'-Methoxy-biphenyl-2-yl)-benzoxazole 3b (Scheme 1):- .....                                                           | 27 |
| <sup>1</sup> H NMR of 2-(3',4'-Dimethoxy-biphenyl-2-yl)-benzoxazole 3c (Scheme 1):-.....                                                        | 28 |
| <sup>13</sup> C NMR of 2-(3',4'-Dimethoxy-biphenyl-2-yl)-benzoxazole 3c (Scheme 1):-.....                                                       | 28 |
| <sup>1</sup> H NMR of 2-(2',3'-Dimethoxy-biphenyl-2-yl)-benzoxazole 3d (Scheme 1):- .....                                                       | 29 |
| <sup>13</sup> C NMR of 2-(2',3'-Dimethoxy-biphenyl-2-yl)-benzoxazole 3d (Scheme 1):- .....                                                      | 29 |
| <sup>1</sup> H NMR of 2-(3'-Cyclopentyloxy-4'-methoxy-biphenyl-2-yl)-benzoxazole 3e (Scheme 1):-.....                                           | 30 |
| <sup>13</sup> C NMR of 2-(3'-Cyclopentyloxy-4'-methoxy-biphenyl-2-yl)-benzoxazole 3e (Scheme 1):-.....                                          | 30 |
| <sup>1</sup> H NMR of 2-(4'-Methylsulfanyl-biphenyl-2-yl)-benzoxazole 3f (Scheme 1):-.....                                                      | 31 |
| <sup>13</sup> C NMR of 2-(4'-Methylsulfanyl-biphenyl-2-yl)-benzoxazole 3f (Scheme 1):-.....                                                     | 31 |
| <sup>1</sup> H NMR of 2-(3'-Chloro-4'-methoxy-biphenyl-2-yl)-benzoxazole 3g (Scheme 1):-.....                                                   | 32 |
| <sup>13</sup> C NMR of 2-(3'-Chloro-4'-methoxy-biphenyl-2-yl)-benzoxazole 3g (Scheme 1):-.....                                                  | 32 |
| <sup>1</sup> H NMR of 2-(3'-Chloro-4'-isopropoxy-biphenyl-2-yl)-benzoxazole 3h (Scheme 1):-.....                                                | 33 |
| <sup>13</sup> C NMR of 2-(3'-Chloro-4'-isopropoxy-biphenyl-2-yl)-benzoxazole 3h (Scheme 1):-.....                                               | 33 |
| <sup>1</sup> H NMR of 2-(4'-Benzyloxy-3'-chloro-biphenyl-2-yl)-benzoxazole 3i (Scheme 1):- .....                                                | 34 |
| <sup>13</sup> C NMR of 2-(4'-Benzyloxy-3'-chloro-biphenyl-2-yl)-benzoxazole 3i (Scheme 1):- .....                                               | 34 |
| <sup>1</sup> H NMR of 2-(4'-Fluoro-biphenyl-2-yl)-benzoxazole 3j (Scheme 1):- .....                                                             | 35 |
| <sup>13</sup> C NMR of 2-(4'-Fluoro-biphenyl-2-yl)-benzoxazole 3j (Scheme 1):-.....                                                             | 35 |

|                                                                                         |    |
|-----------------------------------------------------------------------------------------|----|
| <sup>1</sup> H NMR of 2-(4'-Trifluoromethyl-biphenyl-2-yl)-benzoxazole 3k (Scheme 1):-  | 36 |
| <sup>13</sup> C NMR of 2-(4'-Trifluoromethyl-biphenyl-2-yl)-benzoxazole 3k (Scheme 1):- | 36 |
| <sup>1</sup> H NMR of 2'-Benzoxazol-2-yl-biphenyl-4-carbaldehyde 3l (Scheme 1):-        | 37 |
| <sup>13</sup> C NMR of 2'-Benzoxazol-2-yl-biphenyl-4-carbaldehyde 3l (Scheme 1):-       | 37 |
| <sup>1</sup> H NMR of 2'-Benzoxazol-2-yl-biphenyl-4-carbonitrile 3m (Scheme 1):-        | 38 |
| <sup>13</sup> C NMR of 2'-Benzoxazol-2-yl-biphenyl-4-carbonitrile 3m (Scheme 1):-       | 38 |
| <sup>1</sup> H NMR of 2-(4'-Methanesulfonyl-biphenyl-2-yl)-benzoxazole 3o (Scheme 2):-  | 39 |
| <sup>13</sup> C NMR of 2-(4'-Methanesulfonyl-biphenyl-2-yl)-benzoxazole 3o (Scheme 2):- | 39 |
| <sup>1</sup> H NMR of 2'-Benzoxazol-2-yl-3-chloro-biphenyl-4-ol 3n (Scheme 2):-         | 40 |
| <sup>13</sup> C NMR of 2'-Benzoxazol-2-yl-3-chloro-biphenyl-4-ol 3n (Scheme 2):-        | 40 |
| Scanned HPLC Spectra to Determine the Purity of Compounds                               | 41 |
| HPLC of 2-Biphenyl-2-yl-benzoxazole 3a (Scheme 1):-                                     | 41 |
| HPLC of 2-(4'-Methoxy-biphenyl-2-yl)-benzoxazole 3b (Scheme 1):-                        | 42 |
| HPLC of 2-(3',4'-Dimethoxy-biphenyl-2-yl)-benzoxazole 3c (Scheme 1):-                   | 43 |
| HPLC of 2-(2',3'-Dimethoxy-biphenyl-2-yl)-benzoxazole 3d (Scheme 1):-                   | 44 |
| HPLC of 2-(3'-Cyclopentyloxy-4'-methoxy-biphenyl-2-yl)-benzoxazole 3e (Scheme 1):-      | 45 |
| HPLC of 2-(4'-Methylsulfonyl-biphenyl-2-yl)-benzoxazole 3f (Scheme 1):-                 | 46 |
| HPLC of 2-(3'-Chloro-4'-methoxy-biphenyl-2-yl)-benzoxazole 3g (Scheme 1):-              | 47 |
| HPLC of 2-(3'-Chloro-4'-isopropoxy-biphenyl-2-yl)-benzoxazole 3h (Scheme 1):-           | 48 |
| HPLC of 2-(4'-Benzyloxy-3'-chloro-biphenyl-2-yl)-benzoxazole 3i (Scheme 1):-            | 49 |
| HPLC of 2-(4'-Fluoro-biphenyl-2-yl)-benzoxazole 3j (Scheme 1):-                         | 50 |
| HPLC of 2-(4'-Trifluoromethyl-biphenyl-2-yl)-benzoxazole 3k (Scheme 1):-                | 51 |
| HPLC of 2'-Benzoxazol-2-yl-biphenyl-4-carbaldehyde 3l (Scheme 1):-                      | 52 |
| HPLC of 2'-Benzoxazol-2-yl-biphenyl-4-carbonitrile 3m (Scheme 1):-                      | 53 |
| HPLC of 2-(4'-Methanesulfonyl-biphenyl-2-yl)-benzoxazole 3o (Scheme 2):-                | 54 |
| HPLC of 2'-Benzoxazol-2-yl-3-chloro-biphenyl-4-ol 3n (Scheme 2):-                       | 55 |

### Evolution of selective COX-2 inhibitors from non-selective COX-2 inhibitors:

**Figure A. Transformation of nonselective cyclooxygenase inhibitor to COX-2 selective agnets in the phenyl propionic acid class.**

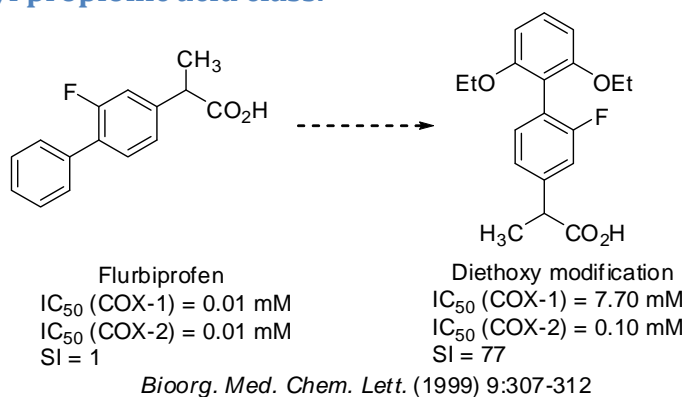

**Figure B. Transformation of nonselective cyclooxygenase inhibitor to COX-2 selective agnets in the indole-3-acetic acid class.**

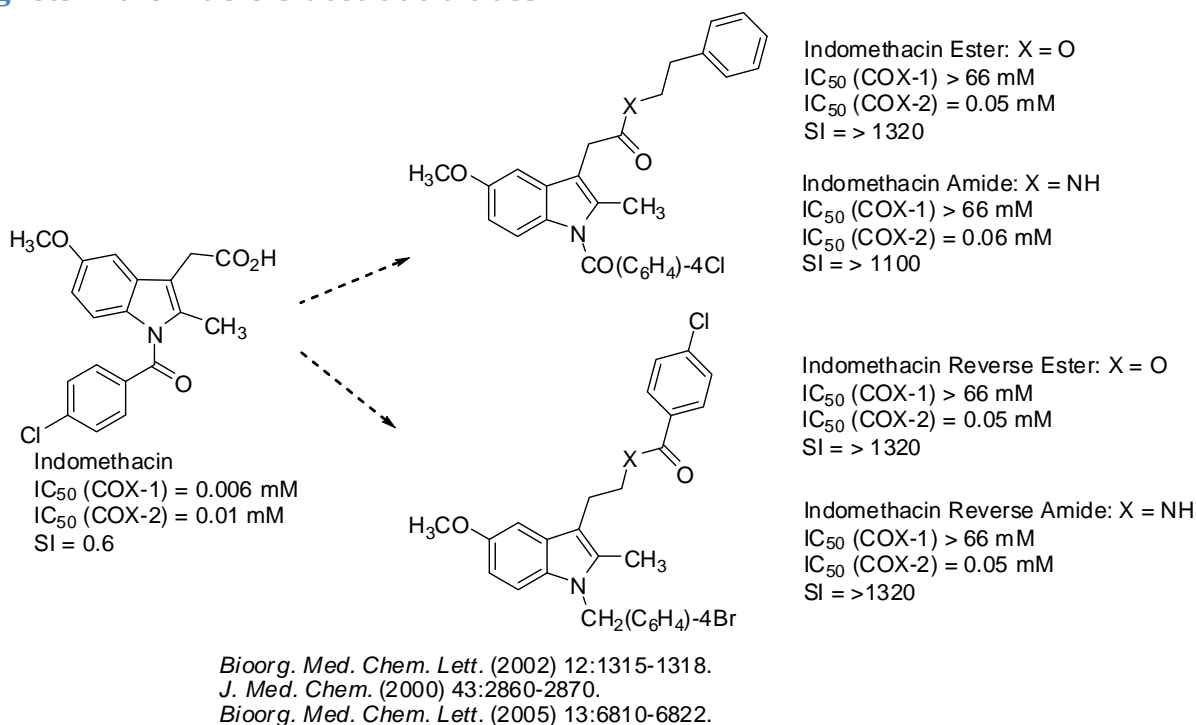

**Figure C. Transformation of nonselective cyclooxygenase inhibitor diclofenac to COX-2 selective analogue as the most selective COX-2 inhibitor.**

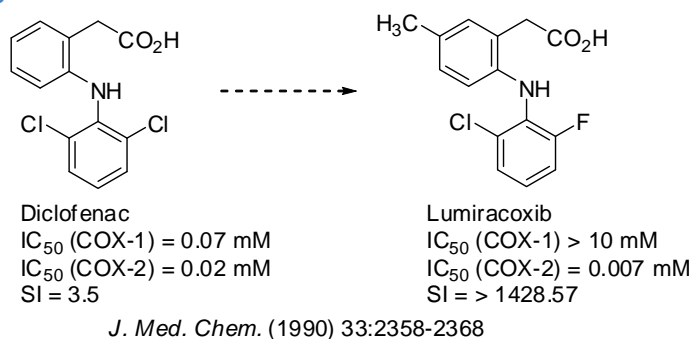

**Figure D. Evolution of the 1,2-diarylheterocycle class (coxibs) selective COX-2 inhibitors from non-selective COX-2 inhibitors.**

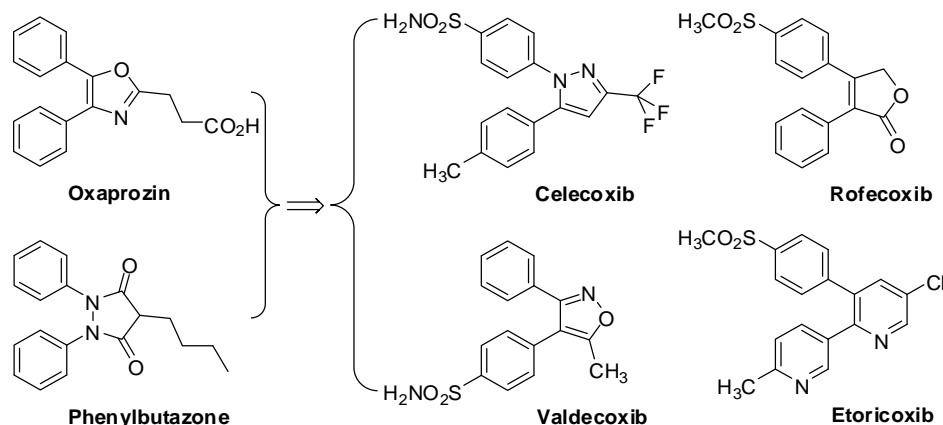

### Determination of Interaction of the Newly Designed Scaffold II in the COX-2 Active Site:

To ascertain whether the newly designed scaffold **II** would be a ligand for COX-2 it was planned to identify the various possible interaction of the representative compound **3a** (belonging to the scaffold **II**) in the COX-2 active site. Therefore, the computational studies (3D QSAR) was performed individually on the COX-1 (3KK6.pdb)<sup>1</sup> and COX-2 (6COX.pdb)<sup>2</sup> active sites using the 'GOLD 4.1.2' software.<sup>3-5</sup>

The X-ray crystal structures of CYCLOOXYGENASE-2 with compound SC-558 was used. 'PyMOL 1.3' was used to optimize the enzyme by removing water molecules, residues and fragments of enzyme. The file was saved in pdb file format. After protein optimization a standard mode of 'GOLD 4.1.2' software was used for the docking purpose. 'GOLD' gives the best poses by a Genetic algorithm search strategy. In 'GOLD' software 'hermes 1.3.1' was used as the visualizer. Validation of process was done by calculating root-mean-square deviation (RMSD), which was 0.21. For docking of the molecules, optimized protein was loaded in the 'GOLD' software, followed by addition of hydrogen and deletion of ligand. The atom and residue were selected in 10 Å range. Then celecoxib and **3a** were separately added to the active

site. The analysis of the interactions was done in 'PyMOL' software. The specific interactions are provided in the docking pose in Fig. E. The satisfactory docking score was obtained with the simplest molecular structure **3a** representing the newly designed scaffold **II**. This encouraged us to generate structural analogues of **3a** through modification/functionalisation of the aryl 2 moiety (Fig. F).

**Figure E. Docking pose of 3a representing the new pharmacophoric feature (II) and of Celecoxib on the active site of COX-2 (6COX).**

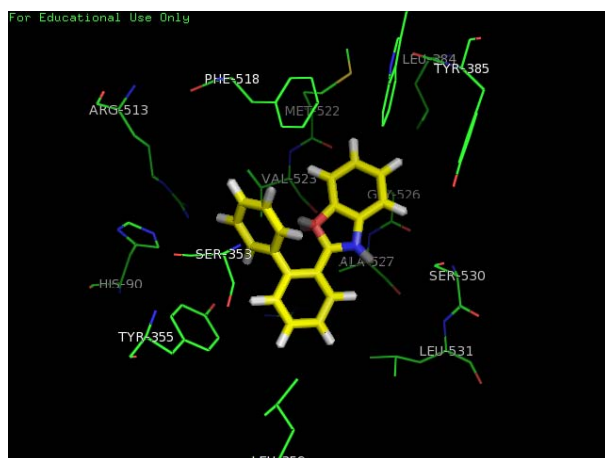

Docking pose of **3a** with score 54.3682

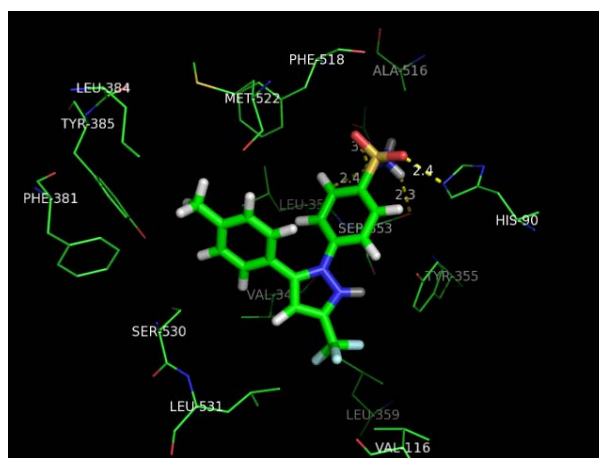

Docking pose of **Celecoxib** with score 70.5354

Comparison of docking pose of **3a** with marketed COX-2 selective drugs celecoxib, etoricoxib and rofecoxib was performed (Fig. F) and it is observed that **3a** has similar 'V shape' docking pose like celecoxib, etoricoxib and rofecoxib.

**Figure F: Comparison of poses of different coxibs with 3a inside the active site of COX-2.**

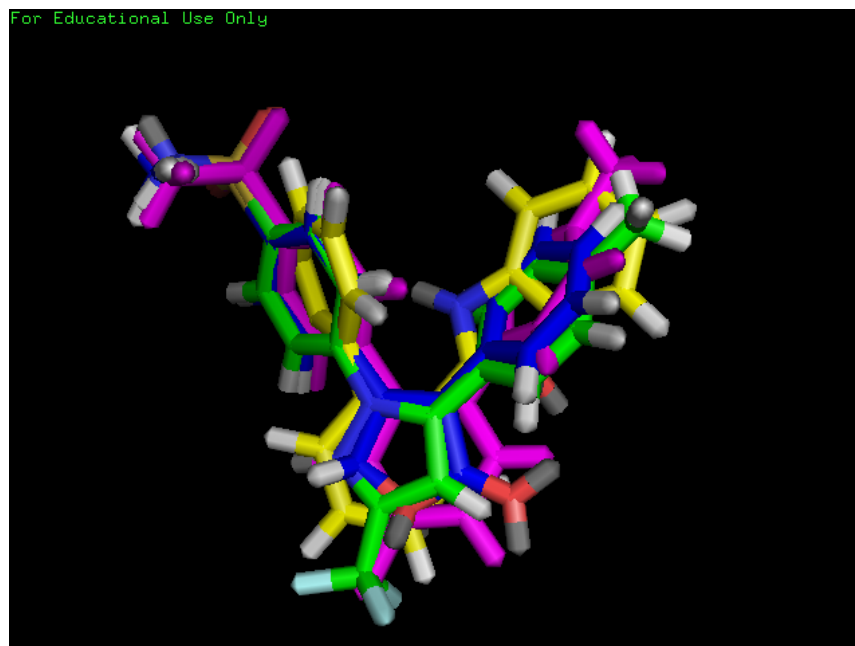

(Celecoxib is in green color, Rofecoxib is in blue color, Etoricoxib is in light pink color and compound **3a** is in yellow color).

### General consideration

The  $^1\text{H}$  and  $^{13}\text{C}$  NMR spectra were recorded on a Bruker Advance 400 MHz NMR spectrometer in  $\text{CDCl}_3$  with residual undeuterated solvent ( $\text{CDCl}_3$ : 7.26/77.0) using  $\text{Me}_4\text{Si}$  as an internal standard. Chemical shifts ( $\delta$ ) are given in ppm and  $J$  values are given in Hz. The IR spectra were recorded either on KBr pellets (for solids) or neat (for liquids) on a Nicolet Impact 410 FTIR spectrometer. The HRMS spectra were recorded on Bruker Maxis instrument. Melting points were measured with Gupta scientific, India melting point apparatus. Open column chromatography, thin layer chromatography (TLC) was performed on Silica gel [CDH silica gel 60-120 mesh, F254 and Merck® silica gel respectively]. Evaporation of solvents was performed at reduced pressure, using a Büchi rotary evaporator. The HPLC was performed in Shimadzu CLASS-VP V6.12 SP3 instrument. All chemicals were purchased from Aldrich, Lancaster and Fluka Chemicals and used as received.

### Typical procedure for the preparation of 2-(2-bromo-phenyl)-benzoxazole **1** (Ref 6):-

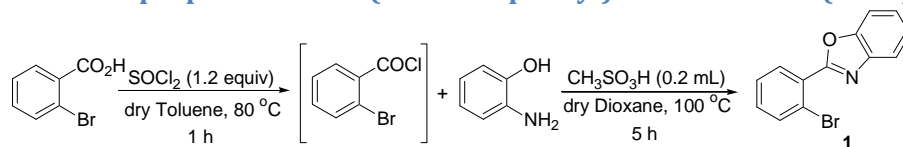

2-Bromobenzoic acid (2.01 g, 10 mmol) was treated with  $\text{SOCl}_2$  (1.427 g, 12 mmol, 0.88 mL, 1.2 equiv) in dry toluene (20 mL) at  $80\text{ }^\circ\text{C}$  until quenching of an aliquot with few drops of MeOH revealed the complete consumption of acid and appearance of new spot in TLC (1 h). The excess  $\text{SOCl}_2$  was distilled off and the reaction mixture was treated with 2-aminophenol (1.09 g, 10 mmol) in dry 1,4-dioxane (20 mL) followed by addition of  $\text{CH}_3\text{SO}_3\text{H}$  (2 mL) and the mixture was stirred magnetically at  $100\text{ }^\circ\text{C}$ . After complete consumption of 2-aminophenol (checked through TLC, 5 h), dioxane was distilled off in rotary evaporator and the residue was diluted with EtOAc (20 mL) followed by saturated aq.  $\text{NaHCO}_3$  (20 mL). The organic layer was separated and the aqueous layer was extracted with EtOAc ( $3 \times 20$  mL). The combined EtOAc extracts were washed with  $\text{H}_2\text{O}$  ( $3 \times 10$  mL), dried (anh  $\text{Na}_2\text{SO}_4$ ) and purified by column chromatography (60-120 mesh silica-gel) using hexane/EtOAc solvent system to afford the **1** as yellow solid, (2.056 g, 75%), mp:  $51\text{-}53\text{ }^\circ\text{C}$ ; TLC (Hexane:EtOAc, 95:5 v/v):  $R_f \approx 0.5$ ;  $^1\text{H}$  NMR ( $\text{CDCl}_3$ , 400 MHz)  $\delta$  (ppm): 7.46-7.38 (m, 3H), 7.50 (dd,  $J = 7.6$  Hz, 1.2 Hz, 1H), 7.66-7.63 (m, 1H), 7.81 (dd,  $J = 8.0$  Hz, 1.2 Hz, 1H), 7.90-7.87 (m, 1H), 8.11 (dd,  $J = 7.8$  Hz, 1.7 Hz, 1H);  $^{13}\text{C}$  NMR ( $\text{CDCl}_3$ , 100 MHz)  $\delta$  (ppm): 110.8, 120.6, 121.9, 124.7, 125.6, 127.5, 128.4, 132.0, 132.2, 134.7, 141.6, 150.7, 161.6; IR (KBr)  $\nu_{\text{max}}$ : 2927, 1277, 1267, 1057, 1039  $\text{cm}^{-1}$ ; HRMS (ESI) ( $\text{M} + \text{Na}$ ) $^+$  calcd. for  $\text{C}_{13}\text{H}_8\text{NOBrNa}$ , 295.9687; found, 295.9684.



**Typical procedure for the conventional Suzuki coupling of **1** with phenylboronic acid **2a** in the presence of Pd catalyst (Scheme 1):-**

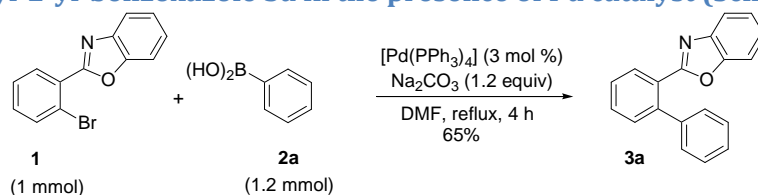

To a magnetically stirred solution of  $[\text{Pd}(\text{PPh}_3)_4]$  (3.5 mg, 0.03 mmol, 3 mol%) in DMF (2 mL) were added **1** (0.274 g, 1 mmol), phenylboronic acid **2a** (0.146 g, 1.2 mmol, 1.2 equiv) and  $\text{Na}_2\text{CO}_3$  (0.127 g, 1.2 mmol, 1.2 equiv) at reflux (the oil-bath temperature was 165 °C). Upon completion of the reaction (4 h, TLC), the reaction mixture was cooled to room temperature; diluted with  $\text{H}_2\text{O}$  (10 mL) and extracted with DCM ( $2 \times 5$  mL) followed by washing with brine (5 mL). The DCM layer was separated from the aqueous layer and then dried (anh  $\text{Na}_2\text{SO}_4$ ); filtered off and evaporated to dryness under vacuum (30 mm Hg). The residue was passed through chromatography column (silica-gel; 60-120 mesh) and eluted with hexane-EtOAc to afford the **3a** as off white semi-solid, (0.176 g, 65%); TLC (Hexane:EtOAc, 95:5 v/v):  $R_f \approx 0.5$ ;  $^1\text{H}$  NMR ( $\text{CDCl}_3$ , 400 MHz)  $\delta$  (ppm): 7.32 – 7.37 (m, 8H), 7.52 – 7.56 (m, 2H), 7.60 – 7.64 (m, 1H), 7.74 – 7.76 (m, 1H), 8.14 – 8.16 (m, 1H); IR (KBr)  $\nu_{\text{max}}$ : 1616, 1455, 1247, 1027  $\text{cm}^{-1}$ ; MS (ESI)  $(\text{M} + \text{H})^+ = 272.6$ .

**Typical procedure for the synthesis of 2'-benzoxazol-2-yl-3-chloro-biphenyl-4-ol **3n** (Scheme 2):-**

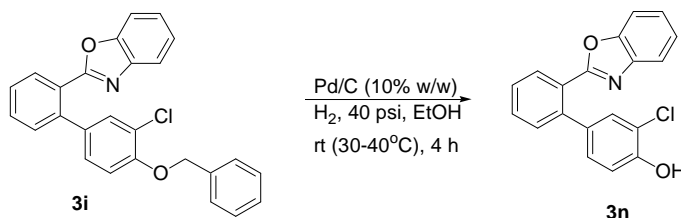

To a solution of 2-(4'-benzyloxy-3'-chloro-biphenyl-2-yl)-benzoxazole **3i** (0.412 g, 1 mmol, 1 equiv) in EtOH (10 mL) was added catalytic Pd/C (10% w/w, 100 mg) at room temperature (30-40 °C). The reaction mixture was charged with  $\text{H}_2$  (40 psi pressure) and shaken on parr hydrogenator. After the completion of the reaction (4 h, TLC), the reaction mixture was filtered through a pad of celite and was concentrated under reduced pressure in rotary vacuum evaporator to afford the crude product which was purified by column chromatography (60-120 mesh silica-gel) using hexane/EtOAc solvent system to afford the **3n** as off white semi-solid, (0.257 g, 80%); TLC (Hexane:EtOAc, 85:15 v/v):  $R_f \approx 0.5$ ;  $^1\text{H}$  NMR ( $\text{CD}_3\text{OD}$ , 400 MHz)  $\delta$  (ppm): 6.84 (d,  $J = 8.0$  Hz, 1H), 6.94 (d,  $J = 8.4$  Hz, 1H), 7.26 (s, 1H), 7.38–7.32 (m, 2H), 7.42–7.40 (m, 1H), 7.55–7.48 (m, 2H), 7.65–7.61 (m, 1H), 7.70–7.68 (m, 1H), 8.00 (d,  $J = 8.0$  Hz, 1H);  $^{13}\text{C}$  NMR ( $\text{CD}_3\text{OD} + \text{CDCl}_3$ , 100 MHz)  $\delta$  (ppm): 110.5, 116.0, 119.4, 120.2, 124.6, 125.3, 125.7, 127.4, 128.1, 129.9, 130.7, 130.9, 131.3, 133.0, 140.9, 141.1, 150.6, 152.4, 164.0; IR (KBr)  $\nu_{\text{max}}$ : 3549, 2987, 1612, 1501, 1476, 1455, 1281, 1259, 1243, 1103  $\text{cm}^{-1}$ ; HRMS (ESI)  $(\text{M} + \text{Na})^+$  calcd. for  $\text{C}_{19}\text{H}_{12}\text{NO}_2\text{ClNa}$ , 344.0454; found, 344.0459.

### Typical procedure for the synthesis of 2-(4'-methanesulfonyl-biphenyl-2-yl)-benzoxazole **3o** (Scheme 2):-

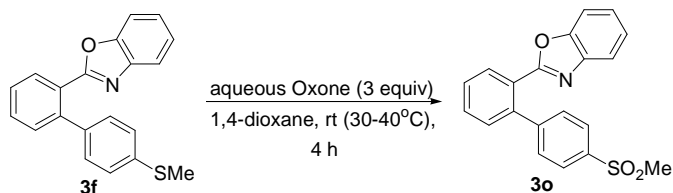

An aqueous solution of oxone (50% w/v, 3 mmol, 3 equiv) was added dropwise to a stirred solution of 2-(4'-methylsulfonyl-biphenyl-2-yl)-benzoxazole **3f** (0.317 g, 1 mmol) in 1,4-dioxane (5 mL) at 0 °C. The reaction was allowed to proceed with stirring at room temperature (30-40 °C) for 4 h (TLC). The reaction mixture was diluted with H<sub>2</sub>O (5 mL), extracted with EtOAc (2 × 5 mL), the EtOAc layer was washed successively with brine solution and water (5 mL each), the organic phase was separated, dried (anh Na<sub>2</sub>SO<sub>4</sub>) and concentrated under reduced pressure in rotary vacuum evaporator to afford the crude product which was purified by column chromatography (60-120 mesh silica-gel) using hexane/EtOAc solvent system to afford the **3o** as off white semi-solid, (0.279 g, 80%); TLC (Hexane:EtOAc, 80:20 v/v): *R<sub>f</sub>* ≈ 0.5; <sup>1</sup>H NMR (CDCl<sub>3</sub>, 400 MHz) δ (ppm): 3.10 (s, 3H), 7.34–7.31 (m, 3H), 7.46 (dd, *J* = 7.2 Hz, 1.6 Hz, 1H), 7.52–7.50 (m, 2H), 7.62–7.57 (m, 2H), 7.69–7.63 (m, 1H), 7.94–7.92 (m, 2H), 8.20 (dd, *J* = 7.2 Hz, 1.6 Hz, 1H), <sup>13</sup>C NMR (CDCl<sub>3</sub>, 100 MHz) δ (ppm): 44.6, 110.5, 120.2, 124.6, 125.4, 126.2, 127.2, 128.7, 129.9, 131.0, 131.2, 139.3, 140.3, 141.5, 146.9, 150.6, 162.7; IR (KBr) *v*<sub>max</sub>: 2953, 2853, 1667, 1594, 1452, 1311, 1150 cm<sup>-1</sup>; HRMS (ESI) (*M* + Na)<sup>+</sup> calcd. for C<sub>20</sub>H<sub>15</sub>NO<sub>3</sub>SNa, 372.0670; found, 372.0666.

### Characterization of compounds

**2-Biphenyl-2-yl-benzoxazole<sup>7</sup> 3a (Scheme 1):-** Off white semi-solid; TLC (Hexane:EtOAc, 95:5 v/v): *R<sub>f</sub>* ≈ 0.5; <sup>1</sup>H NMR (CDCl<sub>3</sub>, 400 MHz) δ (ppm): 7.32 – 7.37 (m, 8H), 7.52 – 7.56 (m, 2H), 7.60 – 7.64 (m, 1H), 7.74 – 7.76 (m, 1H), 8.14 – 8.16 (m, 1H); IR (KBr) *v*<sub>max</sub>: 1616, 1455, 1247, 1027 cm<sup>-1</sup>; MS (ESI) (*M* + H)<sup>+</sup> = 272.6.

**2-(4'-Methoxy-biphenyl-2-yl)-benzoxazole 3b (Scheme 1):-** Off white solid; mp: 109-111 °C; TLC (Hexane:EtOAc, 80:20 v/v): *R<sub>f</sub>* ≈ 0.5; <sup>1</sup>H NMR (CDCl<sub>3</sub>, 400 MHz) δ (ppm): 3.78 (s, 3H), 6.83 – 6.85 (m, 2H), 7.18 – 7.22 (m, 2H), 7.23 – 7.31 (m, 3H), 7.42 – 7.44 (m, 2H), 7.51 – 7.55 (m, 1H), 7.71 – 7.73 (m, 1H), 8.05 – 8.08 (m, 1H); <sup>13</sup>C NMR (CDCl<sub>3</sub>, 100 MHz) δ (ppm): 55.3, 110.6, 113.7, 120.1, 124.3, 124.9, 126.2, 127.2, 130.0, 131.0, 131.1, 131.2, 133.3, 141.8, 142.1, 150.8, 159.0, 164.1; IR (KBr) *v*<sub>max</sub>: 2952, 2929, 1615, 1457, 1249, 1184, 1030 cm<sup>-1</sup>; HRMS (*M* + Na)<sup>+</sup> calcd. for C<sub>20</sub>H<sub>15</sub>NO<sub>2</sub>Na, 324.1000; found, 324.1021.

**2-(3',4'-Dimethoxy-biphenyl-2-yl)-benzoxazole 3c (Scheme 1):-** Off white semi-solid; TLC (Hexane:EtOAc, 75:25 v/v): *R<sub>f</sub>* ≈ 0.5; <sup>1</sup>H NMR (CDCl<sub>3</sub>, 400 MHz) δ (ppm): 3.46 (s, 3H), 3.88 (s, 3H), 6.88 (dd, *J* = 7.6 Hz, 1.5 Hz, 1H), 6.98 (dd, *J* = 8.2 Hz, 1.5 Hz, 1H), 7.08 – 7.12 (m, 1H), 7.26 – 7.30 (m, 3H), 7.49 – 7.51 (m, 1H), 7.54 – 7.60 (m, 2H), 7.68 – 7.71 (m, 1H), 8.24 –

8.26 (m, 1H);  $^{13}\text{C}$  NMR ( $\text{CDCl}_3$ , 100 MHz)  $\delta$  (ppm): 56.1, 60.4, 110.4, 112.3, 120.1, 122.7, 123.8, 124.2, 124.7, 127.0, 127.6, 130.2, 130.6, 131.7, 135.6, 138.3, 141.8, 146.6, 150.7, 152.5, 163.8; IR (KBr)  $\nu_{\text{max}}$ : 2933, 1609, 1521, 1457, 1249, 1027  $\text{cm}^{-1}$ ; HRMS ( $\text{M} + \text{Na}$ ) $^+$  calcd. for  $\text{C}_{21}\text{H}_{17}\text{NO}_3\text{Na}$ , 354.1106; found, 354.1107.

**2-(2',3'-Dimethoxy-biphenyl-2-yl)-benzoxazole 3d (Scheme 1)**:- Off white semi-solid; TLC (Hexane:EtOAc, 75:25 v/v):  $R_f \approx 0.5$ ;  $^1\text{H}$  NMR ( $\text{CDCl}_3$ , 400 MHz)  $\delta$  (ppm): 3.64 (s, 3H), 3.92 (s, 3H), 6.79 (d,  $J = 1.9$  Hz, 1H), 6.86 – 6.91 (m, 2H), 7.30 – 7.35 (m, 3H), 7.51 – 7.56 (m, 2H), 7.59 – 7.61 (m, 1H), 7.75 – 7.77 (m, 1H), 8.05 – 8.08 (m, 1H);  $^{13}\text{C}$  NMR ( $\text{CDCl}_3$ , 100 MHz)  $\delta$  (ppm): 55.7, 55.9, 110.6, 110.9, 112.1, 120.0, 121.1, 124.4, 125.0, 126.4, 127.3, 130.9, 131.0, 131.1, 133.5, 141.6, 142.1, 148.4, 148.5, 150.7, 164.1; IR (KBr)  $\nu_{\text{max}}$ : 2933, 1575, 1471, 1453, 1263, 1022  $\text{cm}^{-1}$ ; HRMS ( $\text{M} + \text{Na}$ ) $^+$  calcd. for  $\text{C}_{21}\text{H}_{17}\text{NO}_3\text{Na}$ , 354.1106; found, 354.1104.

**2-(3'-Cyclopentyloxy-4'-methoxy-biphenyl-2-yl)-benzoxazole 3e (Scheme 1)**:- Off white semi-solid; TLC (Hexane:EtOAc, 90:10 v/v):  $R_f \approx 0.5$ ;  $^1\text{H}$  NMR ( $\text{CDCl}_3$ , 400 MHz)  $\delta$  (ppm): 1.61 – 1.67 (m, 8H), 3.88 (s, 3H), 4.42 – 4.44 (m, 1H), 6.72 (d,  $J = 2.0$  Hz, 1H), 6.89 – 6.96 (m, 2H), 7.27 – 7.37 (m, 3H), 7.48 – 7.54 (m, 2H), 7.58 – 7.62 (m, 1H), 7.74 – 7.76 (m, 1H), 8.04 (dd,  $J = 7.8$  Hz, 1.1 Hz, 1H);  $^{13}\text{C}$  NMR ( $\text{CDCl}_3$ , 100 MHz)  $\delta$  (ppm): 24.0, 32.6, 56.0, 80.2, 110.7, 111.6, 115.7, 120.0, 120.8, 124.3, 124.9, 126.4, 127.2, 130.9, 131.0, 131.1, 133.4, 141.8, 142.3, 147.1, 149.4, 150.9, 164.2; IR (KBr)  $\nu_{\text{max}}$ : 2929, 2657, 1522, 1473, 1457, 1249, 1022  $\text{cm}^{-1}$ ; HRMS ( $\text{M} + \text{Na}$ ) $^+$  calcd. for  $\text{C}_{25}\text{H}_{23}\text{NO}_3\text{Na}$ , 408.1576; found, 408.1575.

**2-(4'-Methylsulfonyl-biphenyl-2-yl)-benzoxazole 3f (Scheme 1)**:- Off white solid; mp: 89-91  $^\circ\text{C}$ ; TLC (Hexane:EtOAc, 95:5 v/v):  $R_f \approx 0.5$ ;  $^1\text{H}$  NMR ( $\text{CDCl}_3$ , 400 MHz)  $\delta$  (ppm): 2.51 (s, 3H), 7.23 (s, 4H), 7.29 – 7.36 (m, 3H), 7.48 – 7.53 (m, 2H), 7.58 – 7.61 (m, 1H), 7.73 – 7.75 (m, 1H), 8.11 (dd,  $J = 7.7$  Hz, 1H);  $^{13}\text{C}$  NMR ( $\text{CDCl}_3$ , 100 MHz)  $\delta$  (ppm): 15.7, 110.6, 120.1, 124.3, 125.0, 126.1, 127.5, 129.2, 131.0, 131.1, 131.1, 137.7, 141.7, 141.8, 150.7, 163.8; IR (KBr)  $\nu_{\text{max}}$ : 2927, 2657, 1599, 1473, 1451, 1249, 1020  $\text{cm}^{-1}$ ; HRMS ( $\text{M} + \text{Na}$ ) $^+$  calcd. for  $\text{C}_{20}\text{H}_{15}\text{NOSNa}$ , 340.0772; found, 340.0770.

**2-(3'-Chloro-4'-methoxy-biphenyl-2-yl)-benzoxazole 3g (Scheme 1)**:- Light yellow solid; mp: 103-105  $^\circ\text{C}$ ; TLC (Hexane:EtOAc, 90:10 v/v):  $R_f \approx 0.5$ ;  $^1\text{H}$  NMR ( $\text{CDCl}_3$ , 400 MHz)  $\delta$  (ppm): 3.94 (s, 3H), 6.88 (d,  $J = 8.5$  Hz, 1H), 7.10 (dd,  $J = 8.5$  Hz, 2.2 Hz, 1H), 7.31 – 7.38 (m, 3H), 7.44 (dd,  $J = 2.2$  Hz, 1H), 7.46 – 7.48 (m, 1H), 7.53 (dt,  $J = 8.6$  Hz, 1.4 Hz, 1H), 7.58 – 7.60 (m, 1H), 7.74 – 7.76 (m, 1H), 8.13 (dd,  $J = 7.8$  Hz, 1.3 Hz, 1H);  $^{13}\text{C}$  NMR ( $\text{CDCl}_3$ , 100 MHz)  $\delta$  (ppm): 56.2, 110.6, 111.5, 120.2, 122.1, 124.4, 125.1, 126.2, 127.7, 128.3, 130.6, 131.1, 131.2, 134.2, 140.7, 141.6, 150.7, 154.3, 163.5; IR (KBr)  $\nu_{\text{max}}$ : 2983, 1611, 1500, 1476, 1453, 1282, 1260, 1243, 1106, 1059  $\text{cm}^{-1}$ ; HRMS ( $\text{M} + \text{Na}$ ) $^+$  calcd. for  $\text{C}_{20}\text{H}_{14}\text{NO}_2\text{ClNa}$ , 358.0611; found, 358.0611.

**2-(3'-Chloro-4'-isopropoxy-biphenyl-2-yl)-benzoxazole 3h (Scheme 1)**:- Off white semi-solid; TLC (Hexane:EtOAc, 95:5 v/v):  $R_f \approx 0.5$ ;  $^1\text{H}$  NMR ( $\text{CDCl}_3$ , 400 MHz)  $\delta$  (ppm): 1.41 (d,  $J = 6.1$  Hz, 6H), 4.55 – 4.60 (m, 1H), 6.88 (d,  $J = 8.5$  Hz, 1H), 7.04 (dd,  $J = 8.4$ , 2.2 Hz, 1H), 7.30 – 7.37 (m, 3H), 7.43 (d,  $J = 2.2$  Hz, 1H), 7.47 – 7.49 (m, 1H), 7.52 – 7.54 (m, 1H), 7.57 – 7.60 (m, 1H), 7.74 – 7.76 (m, 1H), 8.14 (dd,  $J = 7.7$  Hz, 1.3 Hz, 1H);  $^{13}\text{C}$  NMR ( $\text{CDCl}_3$ , 100

MHz)  $\delta$  (ppm): 22.0, 72.2, 110.5, 116.0, 120.1, 124.0, 124.4, 125.0, 126.2, 127.6, 128.2, 130.7, 131.0, 131.1, 134.4, 140.8, 141.7, 150.7, 153.0, 163.6; IR (KBr)  $\nu_{\max}$ : 2977, 1613, 1509, 1478, 1452, 1281, 1260, 1241, 1111, 1062  $\text{cm}^{-1}$ ; HRMS (M + Na)<sup>+</sup> calcd. for C<sub>22</sub>H<sub>18</sub>NO<sub>2</sub>ClNa, 386.0924; found, 386.0927.

**2-(4'-Benzyloxy-3'-chloro-biphenyl-2-yl)-benzoxazole 3i (Scheme 1)**:- Off white semi-solid; TLC (Hexane:EtOAc, 93:7 v/v):  $R_f \approx 0.5$ ; <sup>1</sup>H NMR (CDCl<sub>3</sub>, 400 MHz)  $\delta$  (ppm): 5.18 (s, 2H), 6.90 (d,  $J = 8.5$  Hz, 1H), 7.06 (dd,  $J = 8.4, 2.1$  Hz, 1H), 7.31 – 7.38 (m, 4H), 7.40 – 7.45 (m, 2H), 7.47 – 7.54 (m, 5H), 7.56 – 7.60 (m, 1H), 7.76 – 7.78 (m, 1H), 8.16 (d,  $J = 7.7$  Hz, 1H); <sup>13</sup>C NMR (CDCl<sub>3</sub>, 100 MHz)  $\delta$  (ppm): 70.9, 110.6, 113.5, 120.2, 122.9, 124.5, 125.1, 126.2, 127.1, 127.7, 128.0, 128.3, 128.6, 130.7, 131.1, 131.1, 131.2, 134.6, 136.5, 140.7, 141.6, 150.7, 153.5, 163.5; IR (KBr)  $\nu_{\max}$ : 1607, 1500, 1453, 1293, 1260, 1241, 1057  $\text{cm}^{-1}$ ; HRMS (M + Na)<sup>+</sup> calcd. for C<sub>26</sub>H<sub>18</sub>NO<sub>2</sub>ClNa, 434.0924; found, 434.0922.

**2-(4'-Fluoro-biphenyl-2-yl)-benzoxazole 3j (Scheme 1)**:- Off white semi-solid; TLC (Hexane:EtOAc, 95:5 v/v):  $R_f \approx 0.5$ ; <sup>1</sup>H NMR (CDCl<sub>3</sub>, 400 MHz)  $\delta$  (ppm): 7.31 – 7.34 (m, 3H), 7.43 – 7.45 (m, 2H), 7.48 – 7.50 (m, 1H), 7.59 – 7.65 (m, 4H), 7.72 – 7.74 (m, 1H), 8.19 – 8.22 (m, 1H); <sup>13</sup>C NMR (CDCl<sub>3</sub>, 100 MHz)  $\delta$  (ppm): 110.5, 120.2, 124.5, 125.0, 125.1, 125.2, 125.6, 126.2, 128.3, 129.2, 129.6, 131.0, 131.1, 131.2, 140.9, 141.6, 144.7, 150.6, 163.1; IR (KBr)  $\nu_{\max}$ : 2927, 1749, 1609, 1459, 1278, 1261, 1091  $\text{cm}^{-1}$ ; HRMS (M + Na)<sup>+</sup> calcd. for C<sub>19</sub>H<sub>12</sub>NOFNa, 312.0801; found, 312.0806.

**2-(4'-Trifluoromethyl-biphenyl-2-yl)-benzoxazole 3k (Scheme 1)**:- Off white semi-solid; TLC (Hexane:EtOAc, 95:5 v/v):  $R_f \approx 0.5$ ; <sup>1</sup>H NMR (CDCl<sub>3</sub>, 400 MHz)  $\delta$  (ppm): 7.28 – 7.33 (m, 3H), 7.40 – 7.42 (m, 2H), 7.46 (dd,  $J = 7.4, 1.4$  Hz, 1H), 7.54 – 7.63 (m, 4H), 7.69 – 7.71 (m, 1H), 8.18 (dd,  $J = 7.7, 1.4$  Hz, 1H); <sup>13</sup>C NMR (CDCl<sub>3</sub>, 100 MHz)  $\delta$  (ppm): 110.5, 120.2, 124.5, 125.0, 125.0, 125.1, 125.1, 125.2, 126.2, 128.3, 128.9, 129.3, 129.6, 131.0, 131.1, 131.1, 140.9, 141.6, 144.8, 150.6, 163.1; IR (KBr)  $\nu_{\max}$ : 3001, 1737, 1698, 1677, 1540, 1522, 1457, 1326, 1277, 1261, 1122  $\text{cm}^{-1}$ ; HRMS (M + Na)<sup>+</sup> calcd. for C<sub>20</sub>H<sub>12</sub>NOF<sub>3</sub>Na, 362.0769; found, 362.0774.

**2'-Benzoxazol-2-yl-biphenyl-4-carbaldehyde 3l (Scheme 1)**:- Off white semi-solid; TLC (Hexane:EtOAc, 90:10 v/v):  $R_f \approx 0.5$ ; <sup>1</sup>H NMR (CDCl<sub>3</sub>, 400 MHz)  $\delta$  (ppm): 7.30 – 7.35 (m, 3H), 7.48 – 7.53 (m, 3H), 7.59 – 7.66 (m, 2H), 7.71 – 7.73 (m, 1H), 7.88 – 7.90 (m, 2H), 8.19 – 8.22 (m, 1H), 10.08 (s, 1H); <sup>13</sup>C NMR (CDCl<sub>3</sub>, 100 MHz)  $\delta$  (ppm): 110.6, 120.2, 124.5, 125.2, 126.2, 128.5, 129.6, 129.6, 131.0, 131.0, 131.2, 135.2, 141.0, 141.6, 147.4, 150.6, 163.0, 192.1; IR (KBr)  $\nu_{\max}$ : 1708, 1600, 1241, 1211, 1030  $\text{cm}^{-1}$ ; HRMS (M + Na)<sup>+</sup> calcd. for C<sub>20</sub>H<sub>13</sub>NO<sub>2</sub>Na, 322.0844; found, 322.0849.

**2'-Benzoxazol-2-yl-biphenyl-4-carbonitrile 3m (Scheme 1)**:- Off white semi-solid; TLC (Hexane:EtOAc, 85:15 v/v):  $R_f \approx 0.5$ ; <sup>1</sup>H NMR (CDCl<sub>3</sub>, 400 MHz)  $\delta$  (ppm): 7.34 – 7.36 (m, 3H), 7.42 – 7.44 (m, 2H), 7.46 – 7.48 (m, 1H), 7.61 – 7.64 (m, 2H), 7.65 – 7.68 (m, 2H), 7.70 – 7.72 (m, 1H), 8.20 – 8.24 (m, 1H); <sup>13</sup>C NMR (CDCl<sub>3</sub>, 100 MHz)  $\delta$  (ppm): 110.5, 111.1, 120.3, 124.6, 125.4, 126.1, 128.7, 129.7, 130.9, 131.0, 131.2, 131.9, 140.4, 141.5, 145.9, 150.6; IR (KBr)  $\nu_{\max}$ :

2921, 2859, 2223, 1611, 1457, 1244, 1032  $\text{cm}^{-1}$ ; HRMS ( $\text{M} + \text{Na}$ )<sup>+</sup> calcd. for  $\text{C}_{20}\text{H}_{12}\text{N}_2\text{ONa}$ , 319.0847; found, 319.0844.

## Biology Data

### Cyclooxygenase Inhibition Studies

In vitro COX-1 and COX-2 inhibitory activities ( $\mu\text{M}$ ) were determined using COX inhibitor screening assay kit (ovine COX-1 and human recombinant COX-2) with 96-well plates as per the manufacturer's protocol through direct measurement of  $\text{PGF}_{2\alpha}$  produced by  $\text{SnCl}_2$  reduction of COX-derived  $\text{PGH}_2$ .<sup>8</sup> The samples for determination of initial activity of COX-1, COX-2 and inhibitor screening were prepared by adding 950  $\mu\text{L}$  reaction buffer, 10  $\mu\text{L}$  heme, 10  $\mu\text{L}$  of COX-1/COX-2 enzyme and 20  $\mu\text{L}$  of DMSO (inhibitor dissolved in DMSO in case of inhibitor screening) in separate test tubes. The COX-1/COX-2 background samples were prepared by adding 970  $\mu\text{L}$  reaction buffer, 10  $\mu\text{L}$  heme and 10  $\mu\text{L}$  of inactivated COX-1/COX-2 enzyme (inactivated by incubating in boiling water for 3 min) in the test tube. Reactions were initiated by adding 10  $\mu\text{L}$  of arachidonic acid (AA) to each test tube and incubated at 37 °C for 2 minutes. The enzyme catalysis was quenched by adding 50  $\mu\text{L}$  of 1 M HCl.  $\text{PGH}_2$  thus formed was reduced to  $\text{PGF}_{2\alpha}$  by adding 100  $\mu\text{L}$  of  $\text{SnCl}_2$  solution to each test tube. The quantification of prostaglandin formed in each well was done using specific prostaglandin antiserum and reading the 96-well plate at 405 nm using ELISA plate reader. The results of this assay have been represented in terms of the percent inhibition of COX-1 and COX-2 enzymes at 10  $\mu\text{M}$  of inhibitor/standard concentration. The  $\text{IC}_{50}$  values of the selected test compounds and standard drug was calculated from concentration-inhibition response curve.

### Carrageenan-Induced Paw Edema Method

The acute anti-inflammatory effect was evaluated by the carrageenan-induced paw edema assay in Wistar albino rats following the reported protocol<sup>9</sup> in compliance with the relevant laws on approval with IAEC (Institutional Animal Ethics Committee). The rats were divided into the following groups: carrageenan control, test compounds, celecoxib and diclofenac as standards, each comprising six animals. Acute edema was induced by subplantar administration of 0.1 mL of carrageenan (1%). The test compounds were suspended in 1% Tween-80 suspension and administrated intraperitoneally 10 min after the administration of Carrageenan. Paw volume was measured prior to injection of carrageenan (0 h) and then at an interval of 1 h up to 3 h using a plethysmograph. The results are reported as paw volume expressed in mL. The change in paw volume was measured using the formula:

$$\% \text{ reduction of inflammation} = [1 - (V_t/V_c) \times 100]$$

Where,  $V_t$  is the change in paw volume in the test compound treated group, and  $V_c$ , is the change in paw volume in the control group.

## Rationalisation of COX-2 selectivity of the novel inhibitors **3g**, **3n**, and **3o** through Computational Studies (3D QSAR) and correlation with the coxibs (Celecoxib, Rofecoxib, and Etoricoxib).

For the COX-2 docking studies celecoxib was used as the standard. Celecoxib gave more or less same results as SC-558. Celecoxib maintained four major interactions with Gln192, His90, Ser353 and Leu352 in the COX-2 active site.<sup>10</sup> The hydrogen atom attached to the N atom of the sulfonamide moiety of celecoxib forms hydrogen bonding interaction with the carbonyl oxygen of Gln192 (N-H $\cdots$ O=C-Gln192, 3.0 Å), Leu352 (N-H $\cdots$ O=C-Leu352, 2.4 Å) and Ser353 ((N-H $\cdots$ O=C-Ser353, 2.3 Å). The oxygen atom of sulfonamide moiety of celecoxib forms hydrogen bonding interaction with the imidazole NH of His90 (S=O $\cdots$ H-N-His90, 2.4 Å).

The compounds **3g**, **3n** and **3o** were docked individually. The **3g** showed weak interaction of the hydrogen atom of the methoxy group with the carbonyl (C = O) oxygen atom of Gln192. The docking score was 66.9734. The compound **3n** showed hydrogen bonding interaction through the hydrogen atom of the hydroxyl group with the carbonyl (C = O) oxygen atom of Gln192 (O-H $\cdots$ O=C-Gln192, 3.0 Å). The docking score was 63.1820. The **3o** showed strong hydrogen bonding interaction through the oxygen atom of SO<sub>2</sub>Me group with the hydrogen atom of the C = NH of the guanidine moiety of Arg513 (S=O $\cdots$ H-N-Arg512, 2.8 Å). The docking score was 63.2420. The marketed COX-2 selective drugs, having methyl sulfonyl moieties e.g. rofecoxib and etoricoxib were docked into the active site of COX-2 and similar type of interactions were observed. The devoid of the amino acid Arg513 in COX-1 provides the advantage for COX-2 selectivity.

Celecoxib, **3a**, **3g**, **3n** and **3o** were docked individually into the active site of COX-1 (3KK6). However, none of these showed any significant interaction in the COX-1 active site that account for the COX-2 selectivity of these compounds.



**Table C: Comparison of benzoxazole derivatives with celecoxib in COX-2 (6COX)**

| COMPOUND             | DOCKING POSE | INTERACTION                                     | GOLD SCORE |
|----------------------|--------------|-------------------------------------------------|------------|
| <b>(Celecoxib)</b>   |              | Gln192,<br>His90,<br>Ser353,<br>Leu352.         | 70.5354    |
| <b>(Compound 3b)</b> |              | No interaction                                  | 56.2468    |
| <b>(Compound 3c)</b> |              | Oxygen of OMe<br>is interacting<br>with His 90. | 58.3078    |

|                                                                                                                 |                                                                                      |                |         |
|-----------------------------------------------------------------------------------------------------------------|--------------------------------------------------------------------------------------|----------------|---------|
| 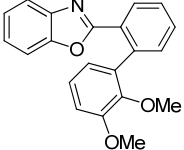 <p><b>(Compound 3d)</b></p>   |    | No interaction | 52.5738 |
|  <p><b>(Compound 3e)</b></p>   |   | No interaction | 39.0231 |
|  <p><b>(Compound 3f)</b></p> |  | No interaction | 58.1373 |



|                             |                                                                                      |                                                                        |                |
|-----------------------------|--------------------------------------------------------------------------------------|------------------------------------------------------------------------|----------------|
| <p><b>(Compound 3g)</b></p> | 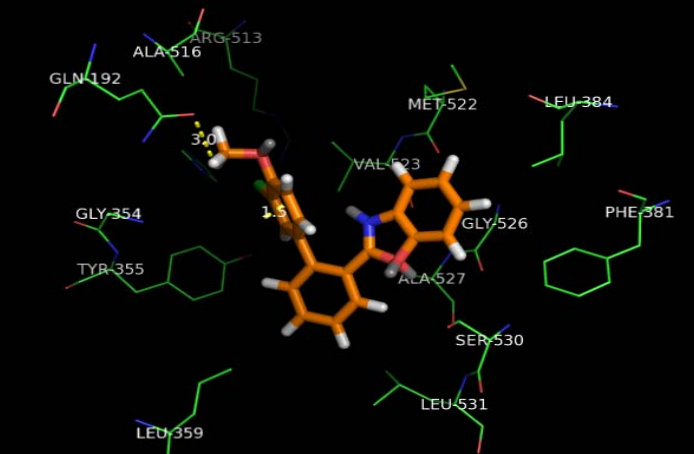   | <p>Weak interaction of hydrogen of methoxy group with Gln192</p>       | <p>66.9734</p> |
| <p><b>(Compound 3h)</b></p> |   | <p>Lone pair of Cl is weakly interacting with carbonyl of Leu 352.</p> | <p>58.1217</p> |
| <p><b>(Compound 3i)</b></p> |  | <p>Lone pair of Cl is weakly interacting with NH of His 90.</p>        | <p>52.3478</p> |

|                                                                                                                 |                                                                                      |                                                                                        |                |
|-----------------------------------------------------------------------------------------------------------------|--------------------------------------------------------------------------------------|----------------------------------------------------------------------------------------|----------------|
| 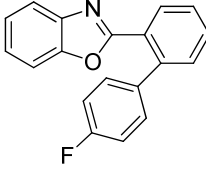 <p><b>(Compound 3j)</b></p>   |    | <p>Lone pair of F is very weakly interacting with carbonyl of Leu 352.</p>             | <p>51.5463</p> |
|  <p><b>(Compound 3k)</b></p>   |   | <p>Lone pair of F is very weakly interacting with carbonyl of Leu 352 and Gln 192.</p> | <p>58.3421</p> |
|  <p><b>(Compound 3l)</b></p> |  | <p>Oxygen of C=O is interacting with N-H of PHE 518.</p>                               | <p>55.4321</p> |

|                             |                                                                                                                      |                                                                          |                |
|-----------------------------|----------------------------------------------------------------------------------------------------------------------|--------------------------------------------------------------------------|----------------|
| <p><b>(Compound 3m)</b></p> | 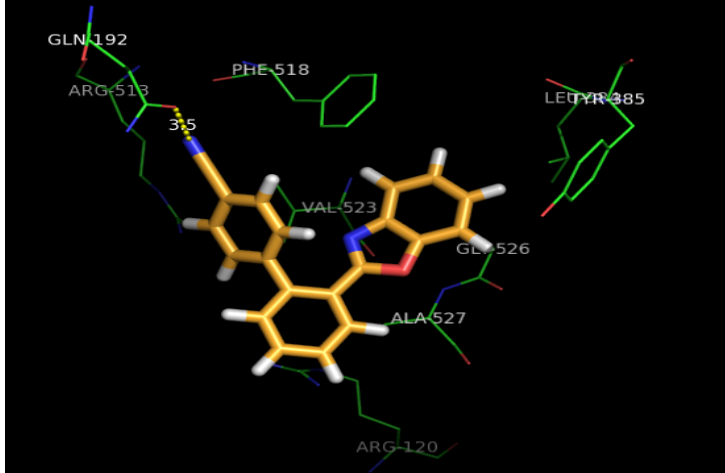                                   | <p>Nitrogen of cyano group is weakly interacting of C= O of Gln 192.</p> | <p>56.3256</p> |
| <p><b>(Compound 3n)</b></p> | <p>For Educational Use Only</p>   | <p>Hydroxy is interacting with Gln192</p>                                | <p>63.1820</p> |
| <p><b>(Compound 3o)</b></p> | <p>For Educational Use Only</p>  | <p>Oxygen of SO<sub>2</sub>Me is interacting with Arg 513</p>            | <p>63.2420</p> |

|                                                                                                              |                                                                                                                     |                                                              |                |
|--------------------------------------------------------------------------------------------------------------|---------------------------------------------------------------------------------------------------------------------|--------------------------------------------------------------|----------------|
| 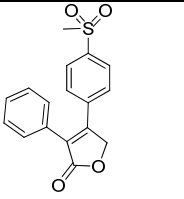 <p><b>(Rofecoxib)</b></p>  | <p>For Educational Use Only</p>   | <p>Oxygen of SO<sub>2</sub>Me is interacting with Arg513</p> | <p>64.2373</p> |
|  <p><b>(Etoricoxib)</b></p> | <p>For Educational Use Only</p>  | <p>Oxygen of SO<sub>2</sub>Me is interacting with Arg513</p> | <p>71.1039</p> |

**Figure G: Comparison of poses of different coxibs (celecoxib, etoricoxib, rofecoxib) with 3b-3f and 3h-3m inside the active site of COX-2.**

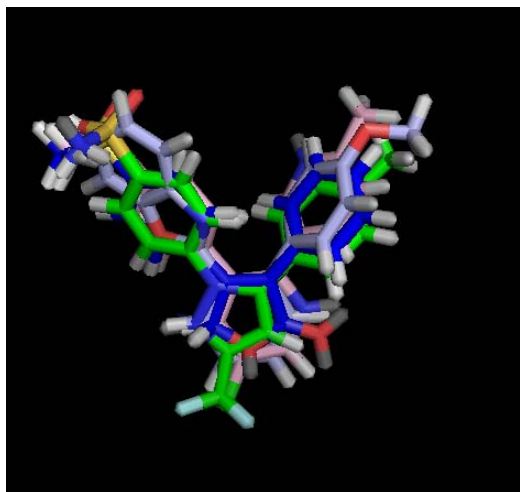

Celecoxib is in green color, Etoricoxib is in pink color, Rofecoxib is in blue color and **compound 3b** is in light blue.

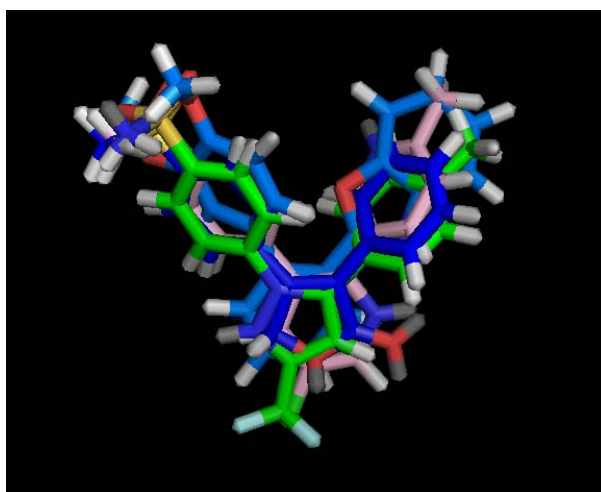

Celecoxib is in green color, Etoricoxib is in pink color, Rofecoxib is in blue color and **compound 3c** is in marine blue.

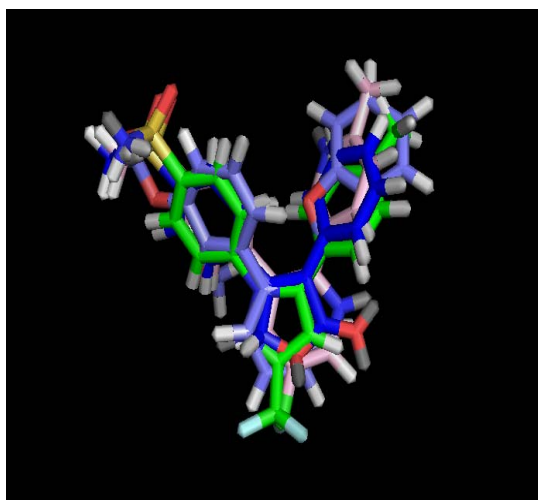

Celecoxib is in green color, Etoricoxib is in pink color, Rofecoxib is in blue color and **compound 3d** is in slate blue.

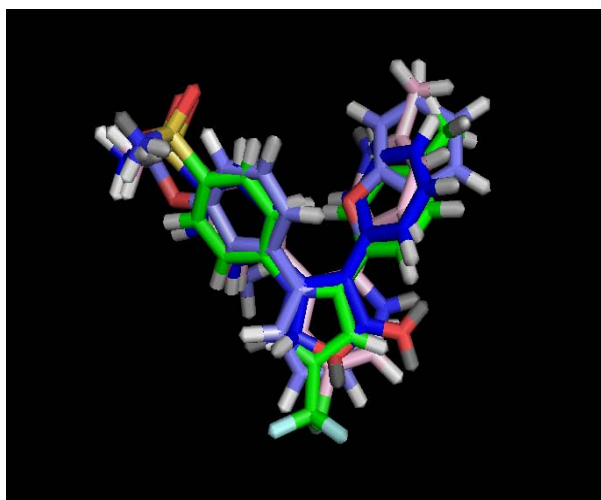

Celecoxib is in green color, Etoricoxib is in pink color, Rofecoxib is in blue color and **compound 3e** is in purple blue.

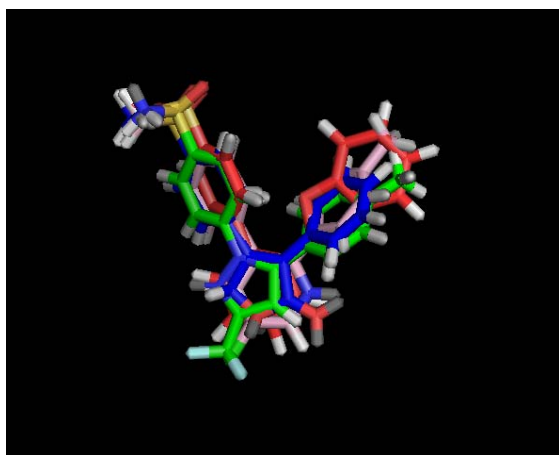

Celecoxib is in green color, Etoricoxib is in pink color, Rofecoxib is in blue color and **compound 3f** is in tv red.

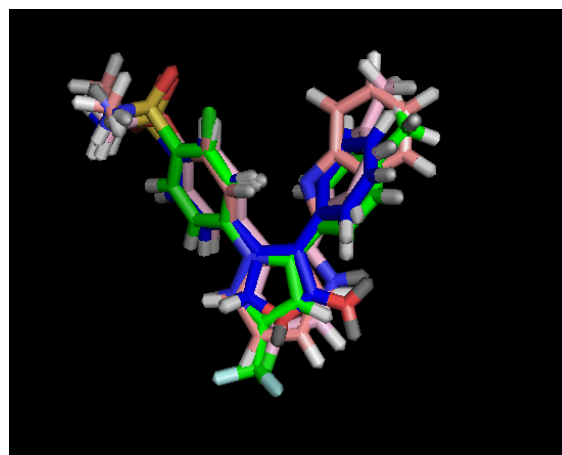

Celecoxib is in green color, Etoricoxib is in pink color, Rofecoxib is in blue color and **compound 3h** is in red selmon.

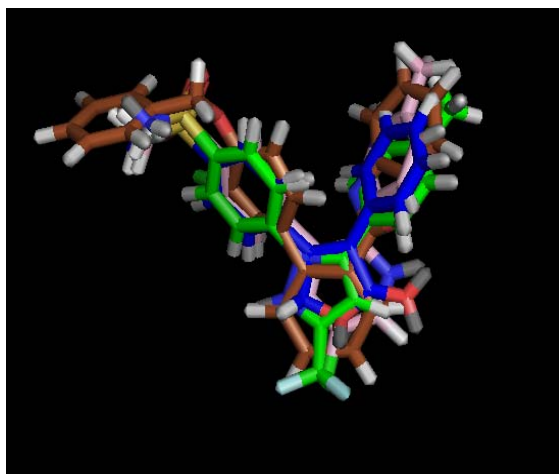

Celecoxib is in green color, Etoricoxib is in pink color, Rofecoxib is in blue color and **compound 3i** is in red brown color.

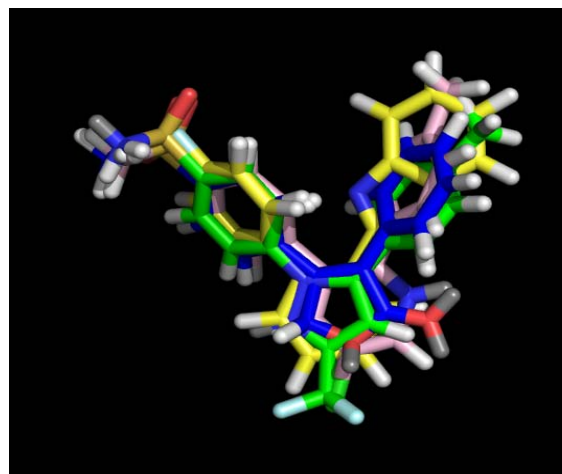

Celecoxib is in green color, Etoricoxib is in pink color, Rofecoxib is in blue color and **compound 3j** is in tv yellow color.

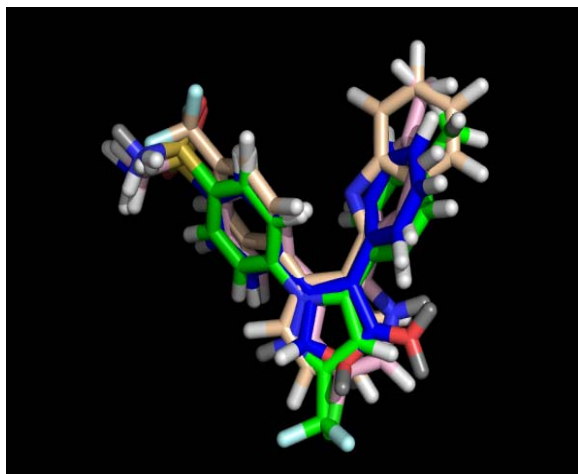

Celecoxib is in green color, Etoricoxib is in pink color, Rofecoxib is in blue color and **compound 3k** is in yellow wheat color.

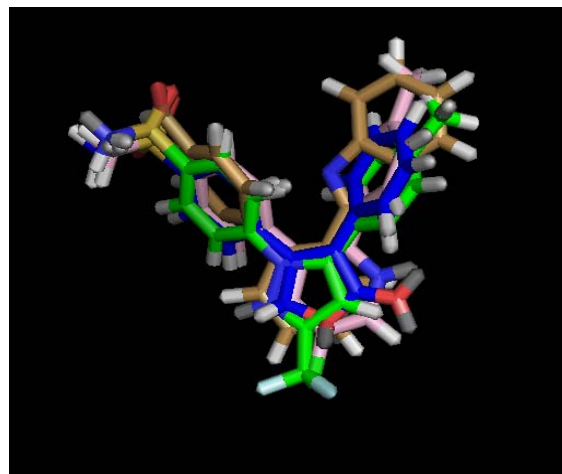

Celecoxib is in green color, Etoricoxib is in pink color, Rofecoxib is in blue color and **compound 3l** is in yellow sand color.

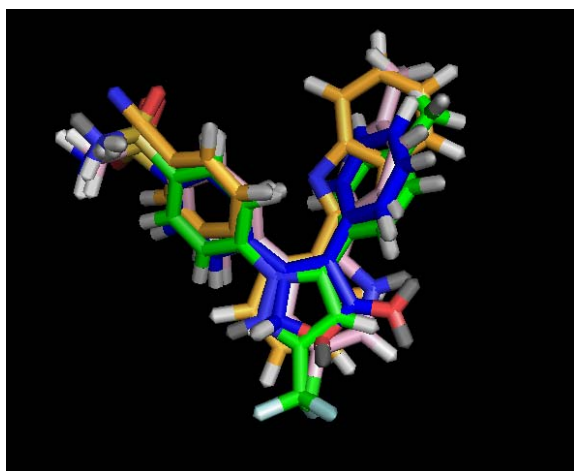

Celecoxib is in green color, Etoricoxib is in pink color, Rofecoxib is in blue color and **compound 3m** is in bright orange color.

Comparison of docking poses of **3g**, **3n** and **3o** with celecoxib was performed (Fig. H) and it was observed that all of these compounds have 'V shape' docking pose similar to that with celecoxib.

**Figure H: Comparison of interaction poses of 3g, 3n and 3o with celecoxib inside the active site of COX-2.**

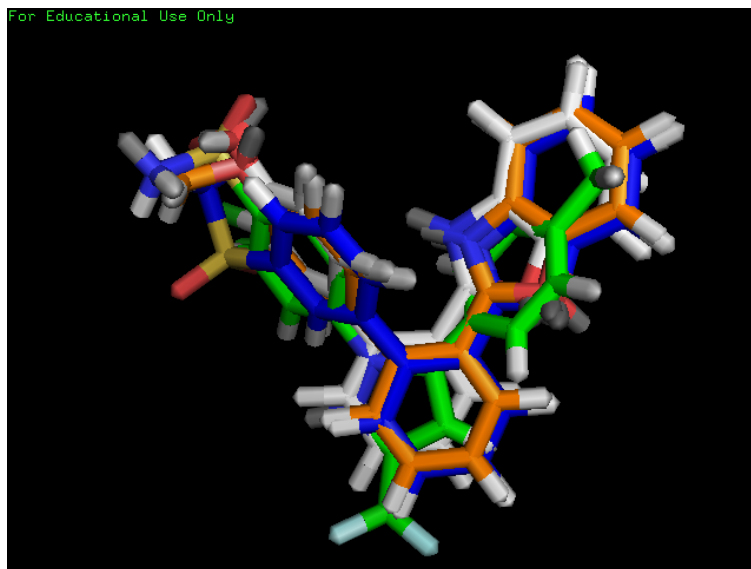

(Celecoxib is in green color, **3g** is in orange color, **3n** is in gray white color and **3o** is in blue color).



# Scanned NMR Spectra

## <sup>1</sup>H NMR of 2-(2-Bromophenyl)-benzoxazole 1:-

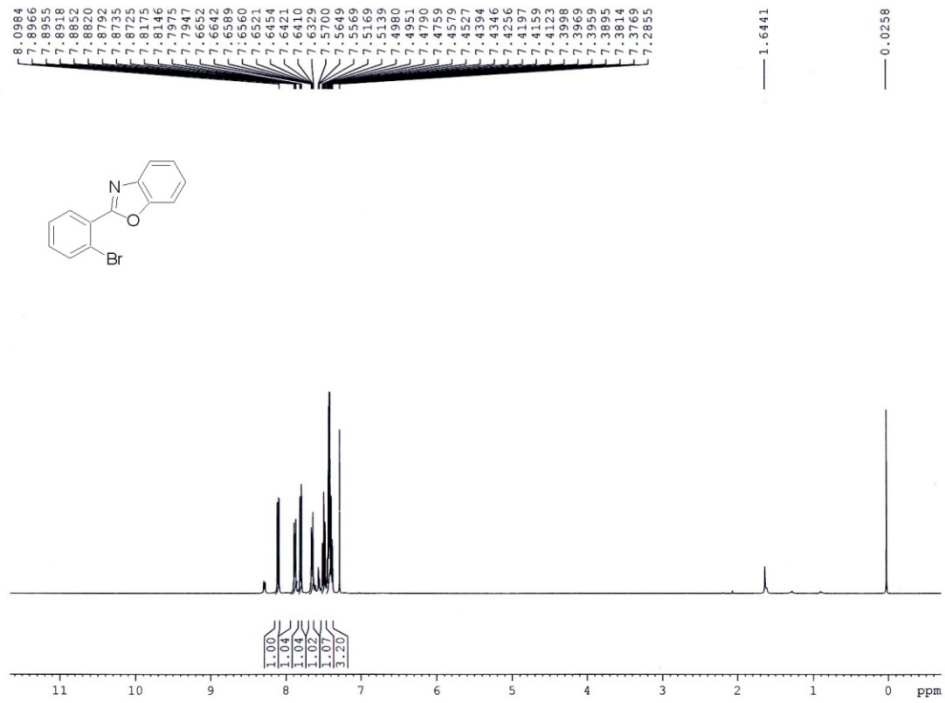

## <sup>13</sup>C NMR of 2-(2-Bromophenyl)-benzoxazole 1:-

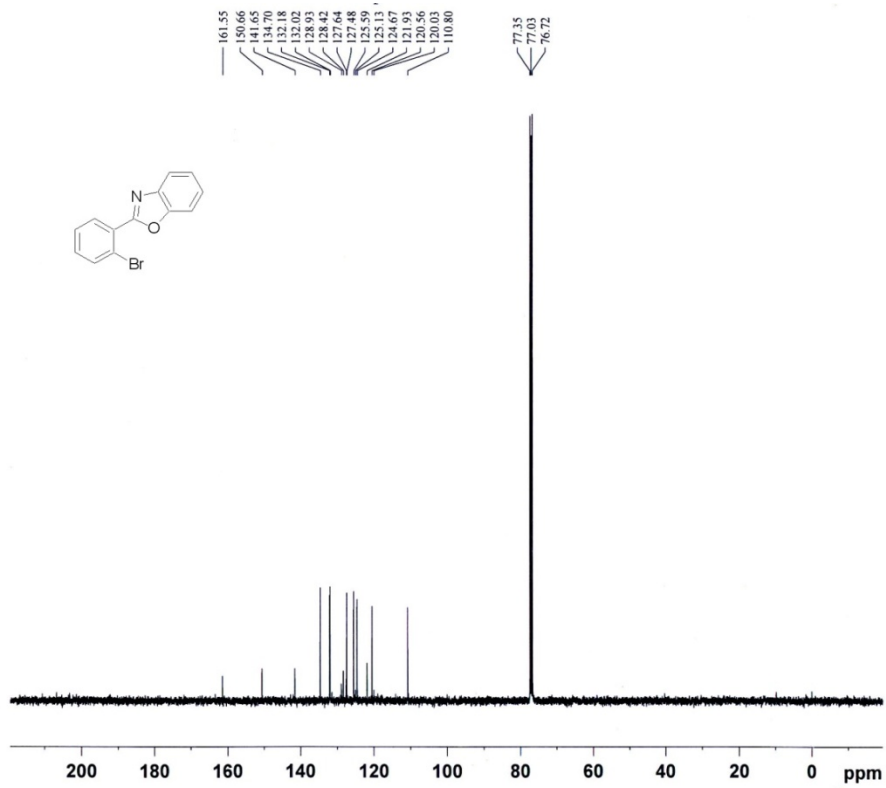

# <sup>1</sup>H NMR of 2-Biphenyl-2-yl-benzoxazole 3a (Scheme 1):-

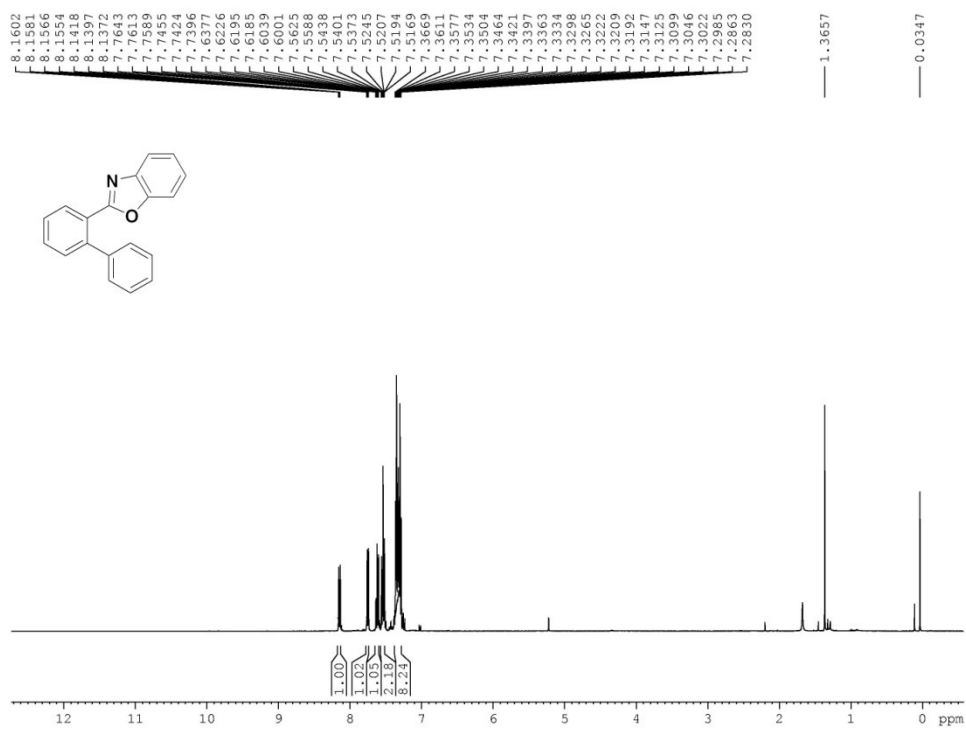

### <sup>1</sup>H NMR of 2-(4'-Methoxy-biphenyl-2-yl)-benzoxazole 3b (Scheme 1):-

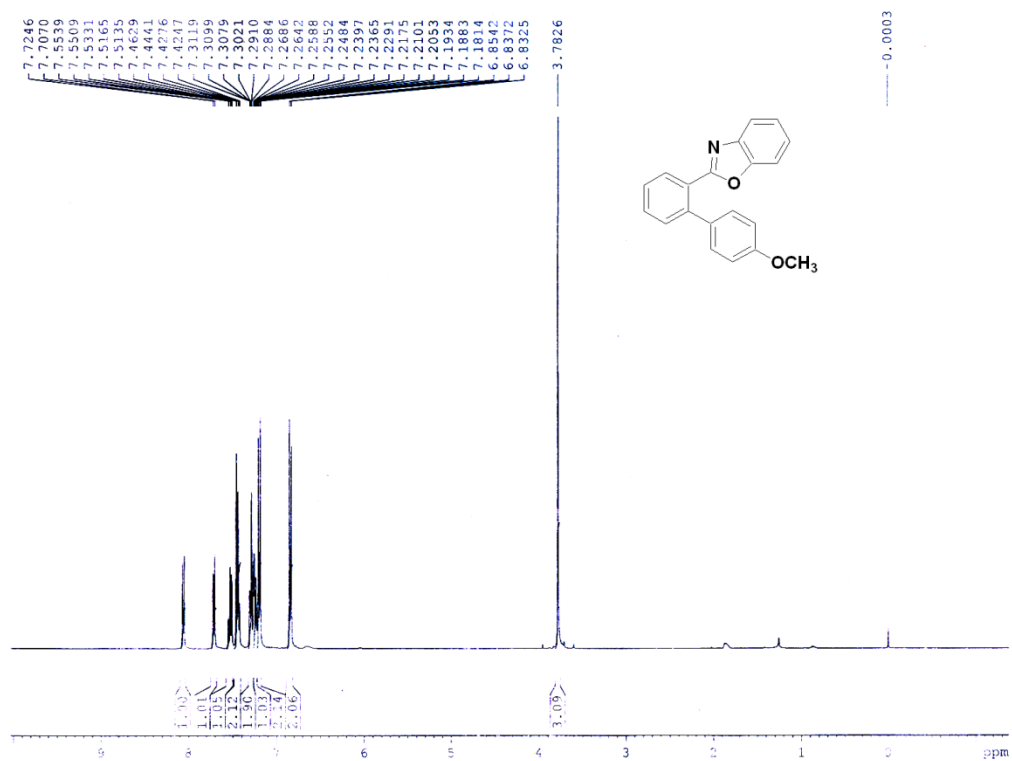

### <sup>13</sup>C NMR of 2-(4'-Methoxy-biphenyl-2-yl)-benzoxazole 3b (Scheme 1):-

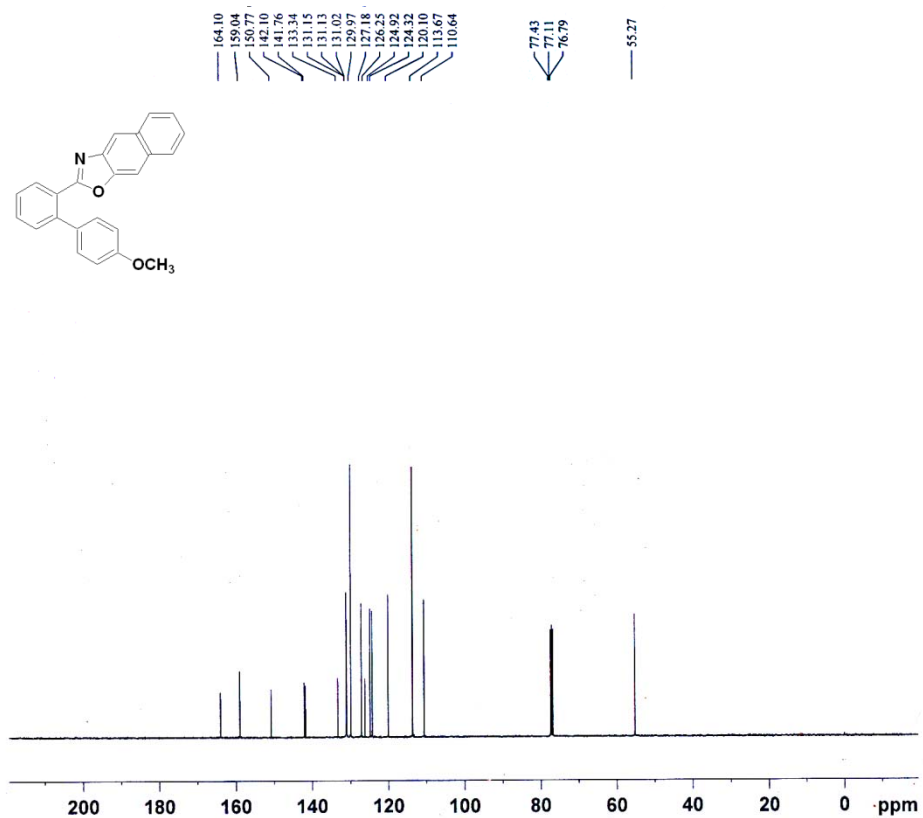

### <sup>1</sup>H NMR of 2-(3',4'-Dimethoxy-biphenyl-2-yl)-benzoxazole 3c (Scheme 1):-

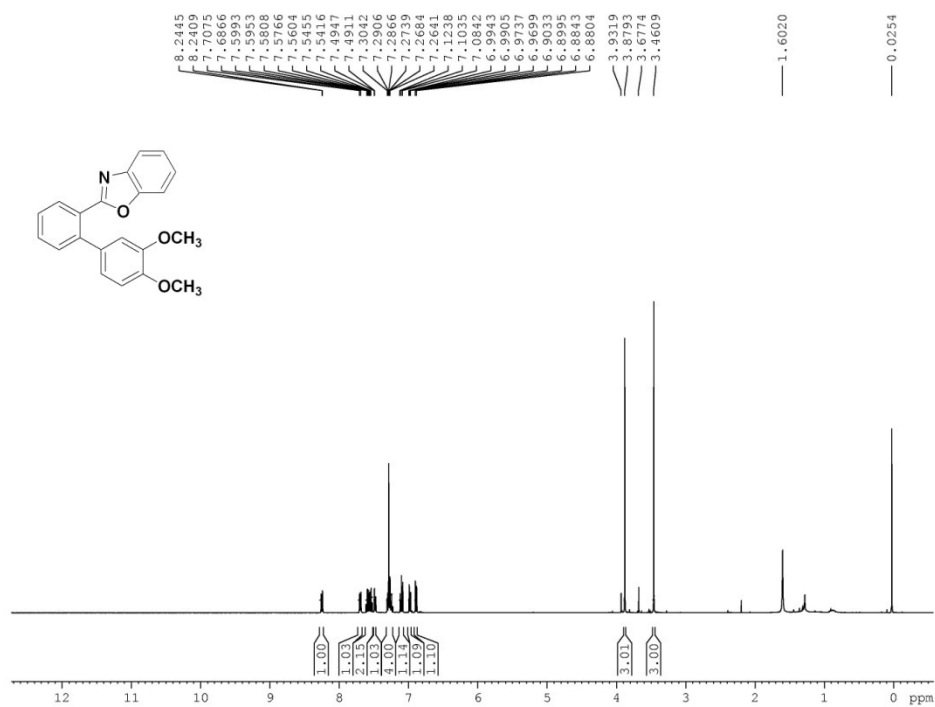

### <sup>13</sup>C NMR of 2-(3',4'-Dimethoxy-biphenyl-2-yl)-benzoxazole 3c (Scheme 1):-

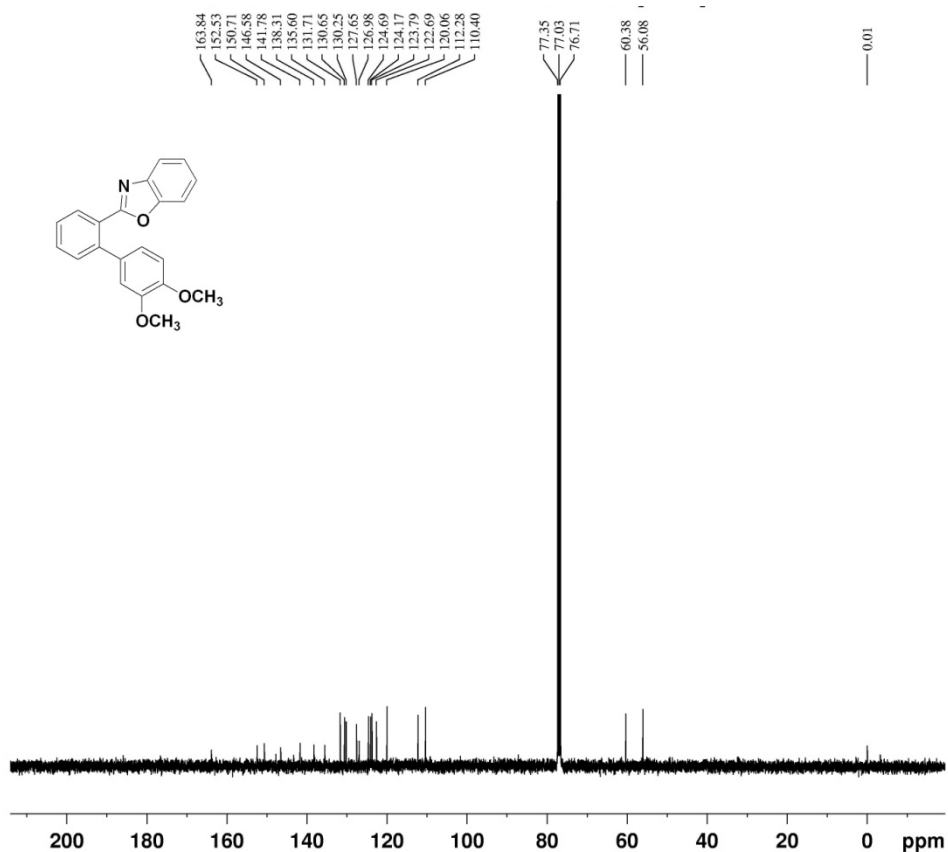

**<sup>1</sup>H NMR of 2-(2',3'-Dimethoxy-biphenyl-2-yl)-benzoxazole 3d (Scheme 1):-**

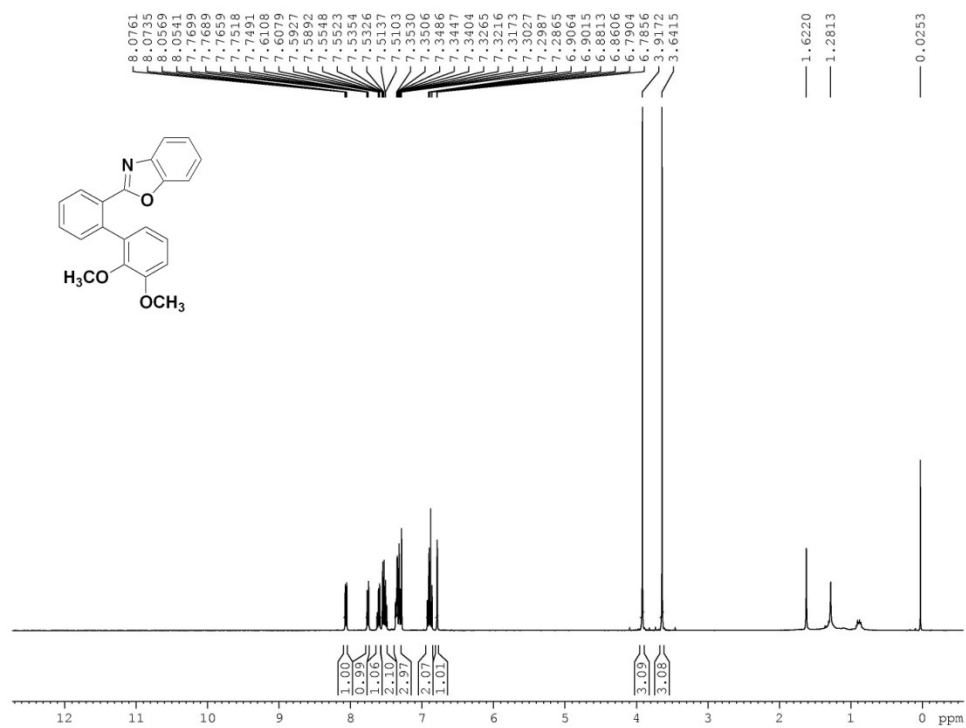

**<sup>13</sup>C NMR of 2-(2',3'-Dimethoxy-biphenyl-2-yl)-benzoxazole 3d (Scheme 1):-**

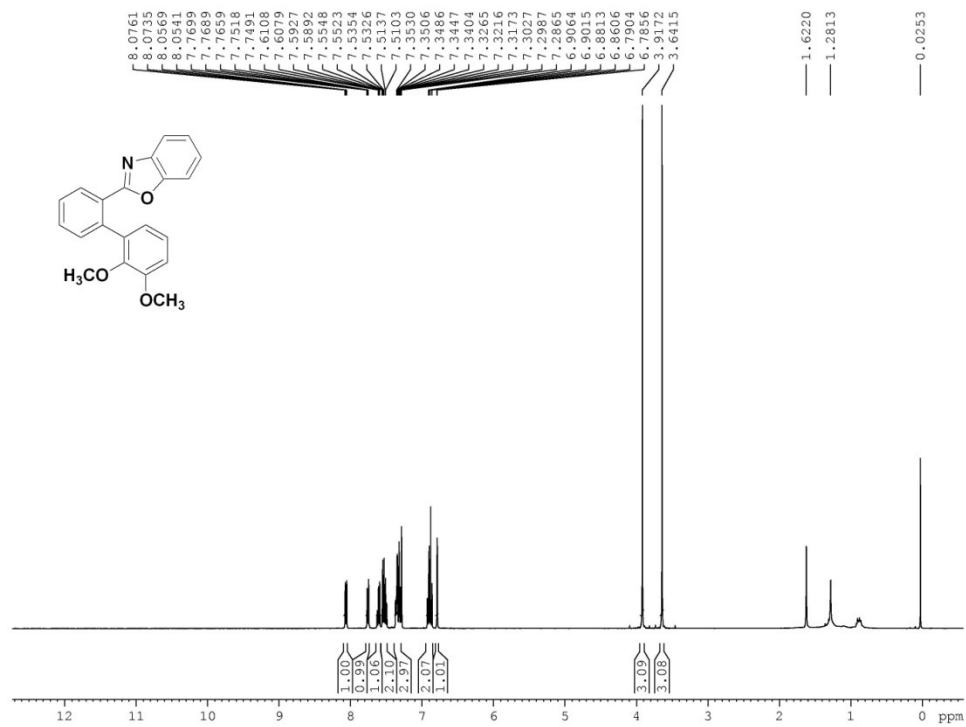

**<sup>1</sup>H NMR of 2-(3'-Cyclopentyloxy-4'-methoxy-biphenyl-2-yl)-benzoxazole 3e (Scheme 1):-**

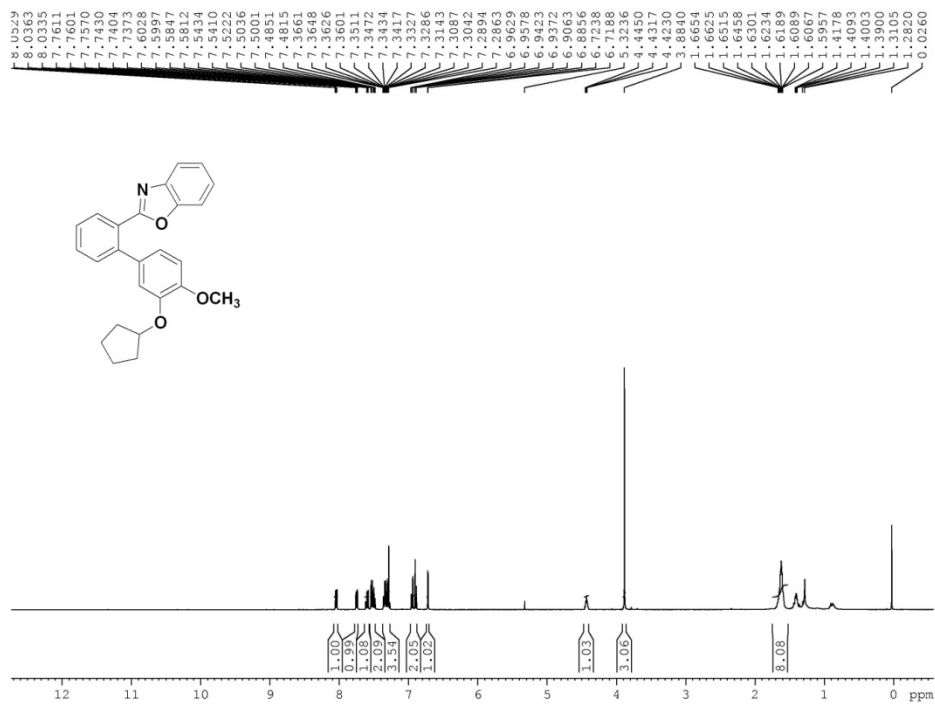

**<sup>13</sup>C NMR of 2-(3'-Cyclopentyloxy-4'-methoxy-biphenyl-2-yl)-benzoxazole 3e (Scheme 1):-**

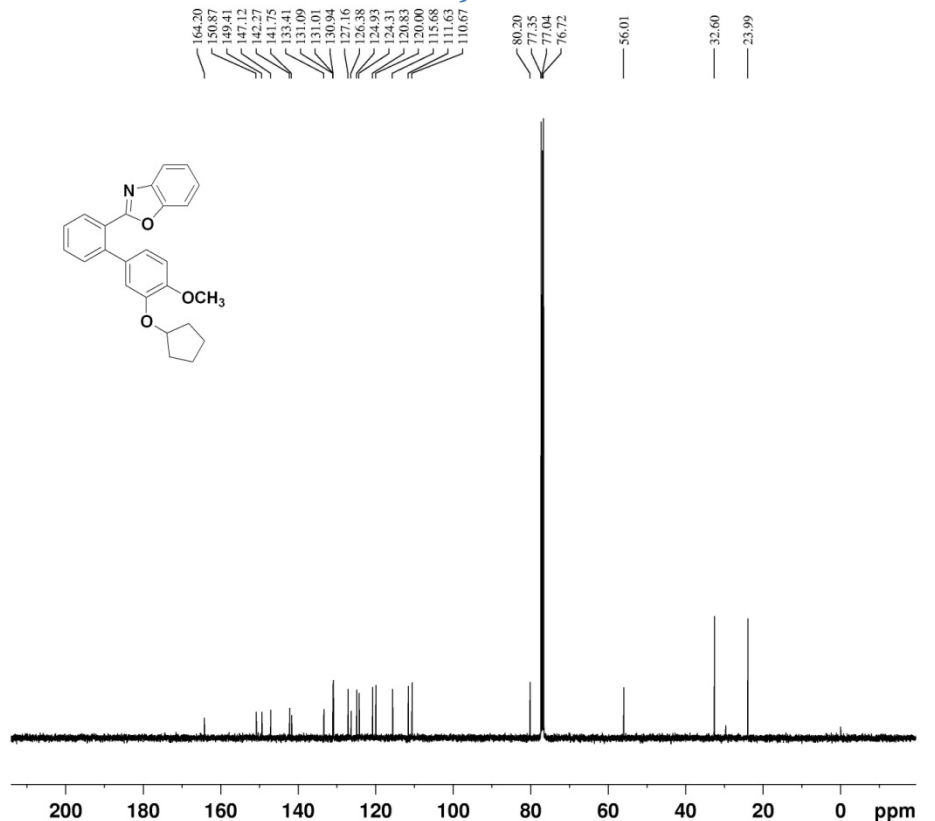



**<sup>1</sup>H NMR of 2-(3'-Chloro-4'-methoxy-biphenyl-2-yl)-benzoxazole 3g (Scheme 1):-**

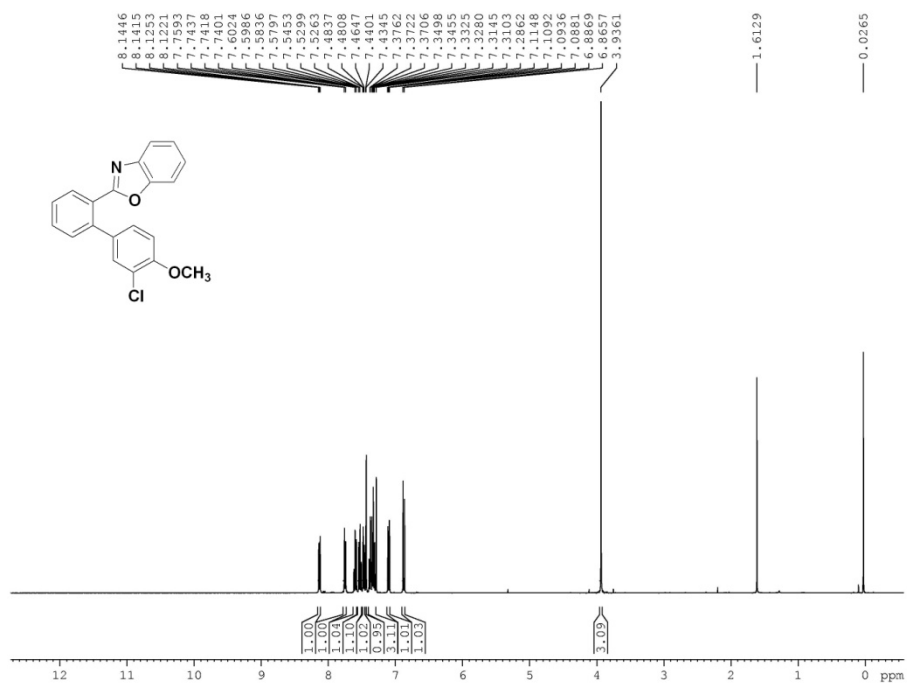

**<sup>13</sup>C NMR of 2-(3'-Chloro-4'-methoxy-biphenyl-2-yl)-benzoxazole 3g (Scheme 1):-**

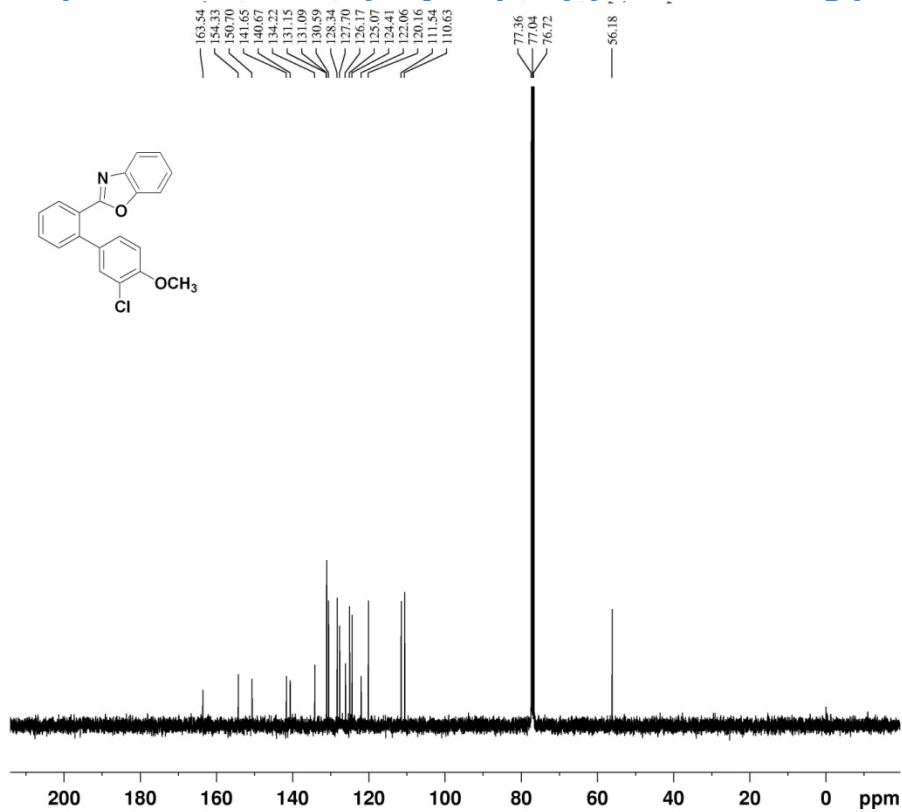



### <sup>1</sup>H NMR of 2-(3'-Chloro-4'-isopropoxy-biphenyl-2-yl)-benzoxazole 3h (Scheme 1):-

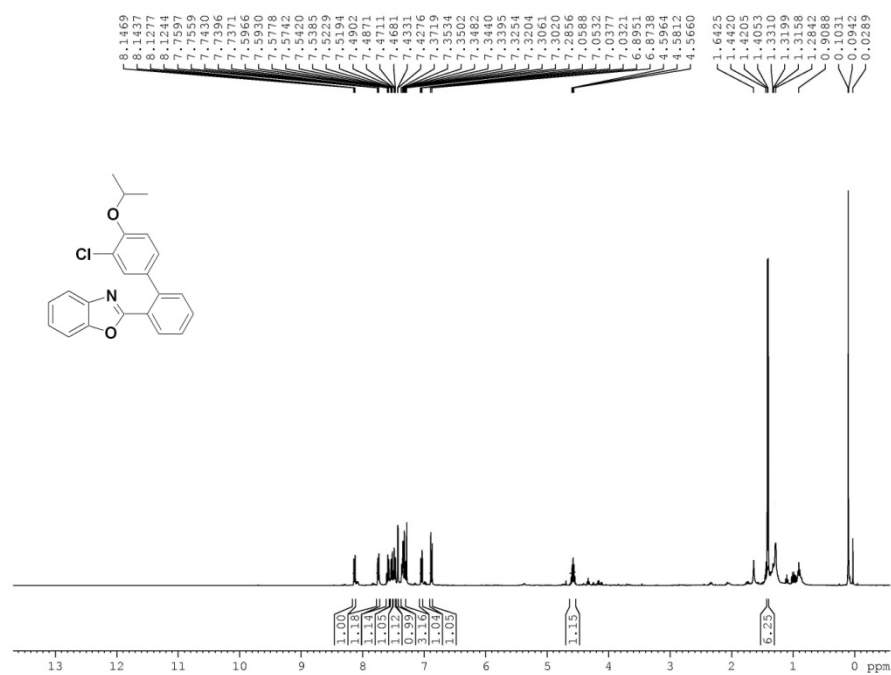

### <sup>13</sup>C NMR of 2-(3'-Chloro-4'-isopropoxy-biphenyl-2-yl)-benzoxazole 3h (Scheme 1):-

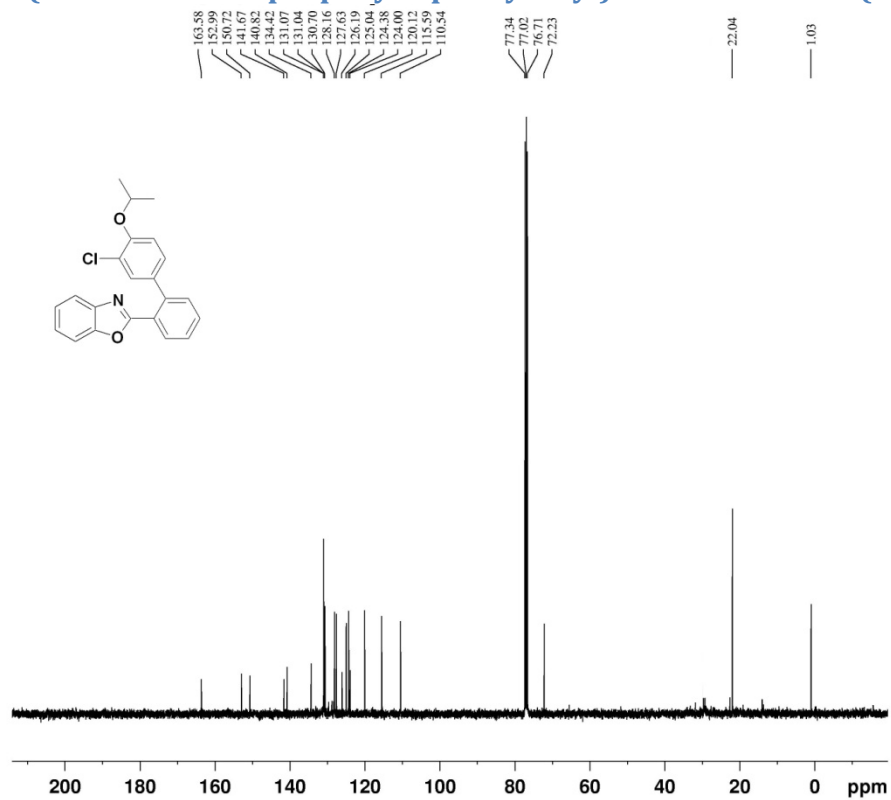

**<sup>1</sup>H NMR of 2-(4'-Benzyloxy-3'-chloro-biphenyl-2-yl)-benzoxazole 3i (Scheme 1):-**

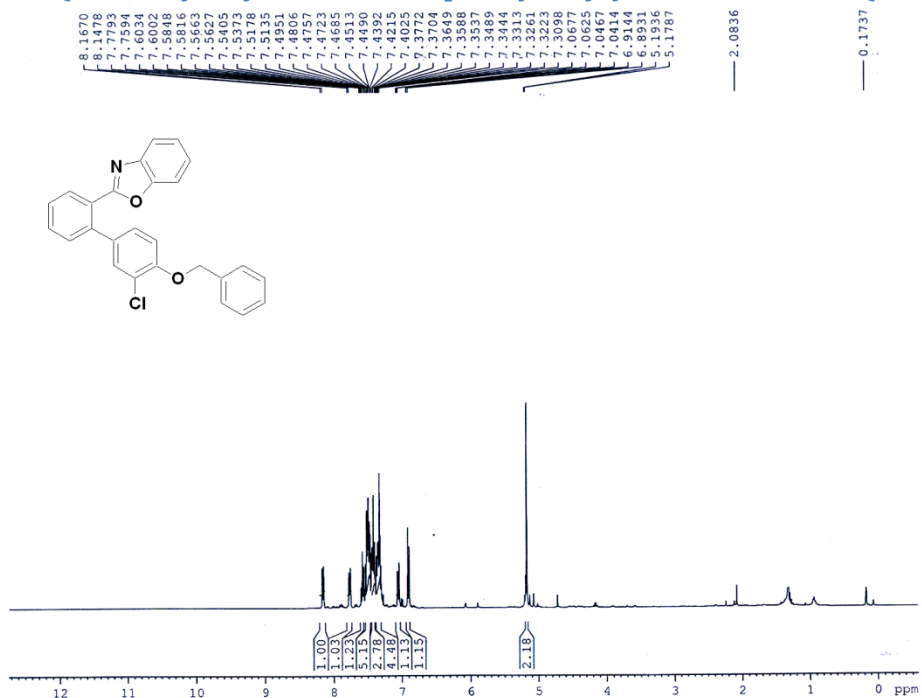

**<sup>13</sup>C NMR of 2-(4'-Benzyloxy-3'-chloro-biphenyl-2-yl)-benzoxazole 3i (Scheme 1):-**

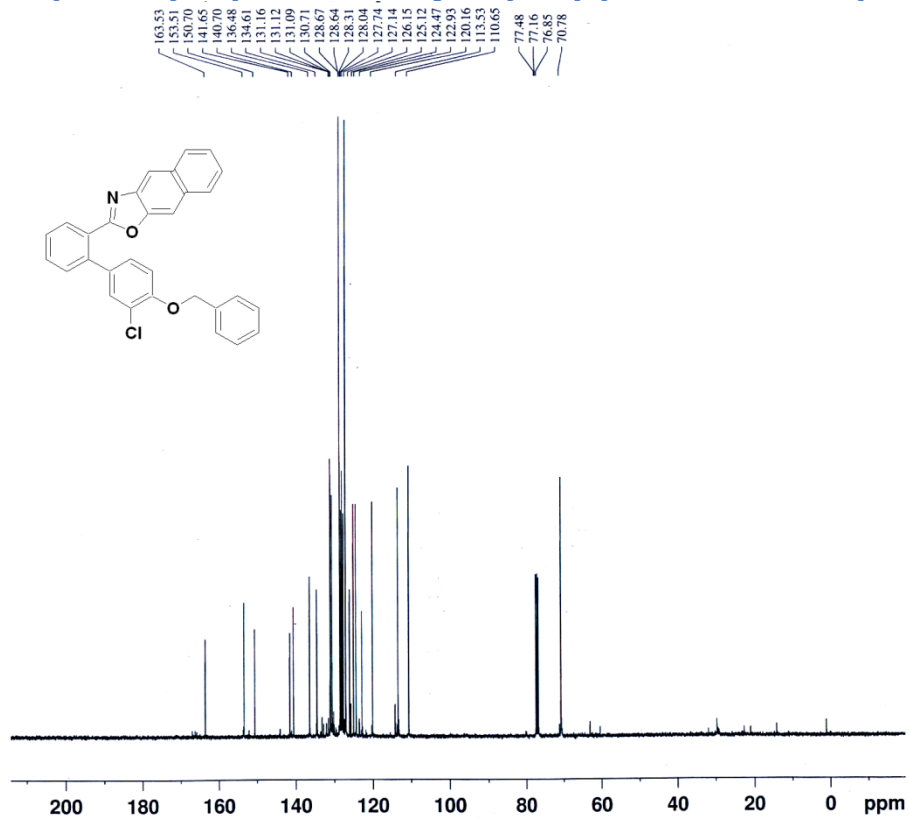

### <sup>1</sup>H NMR of 2-(4'-Fluoro-biphenyl-2-yl)-benzoxazole 3j (Scheme 1):-

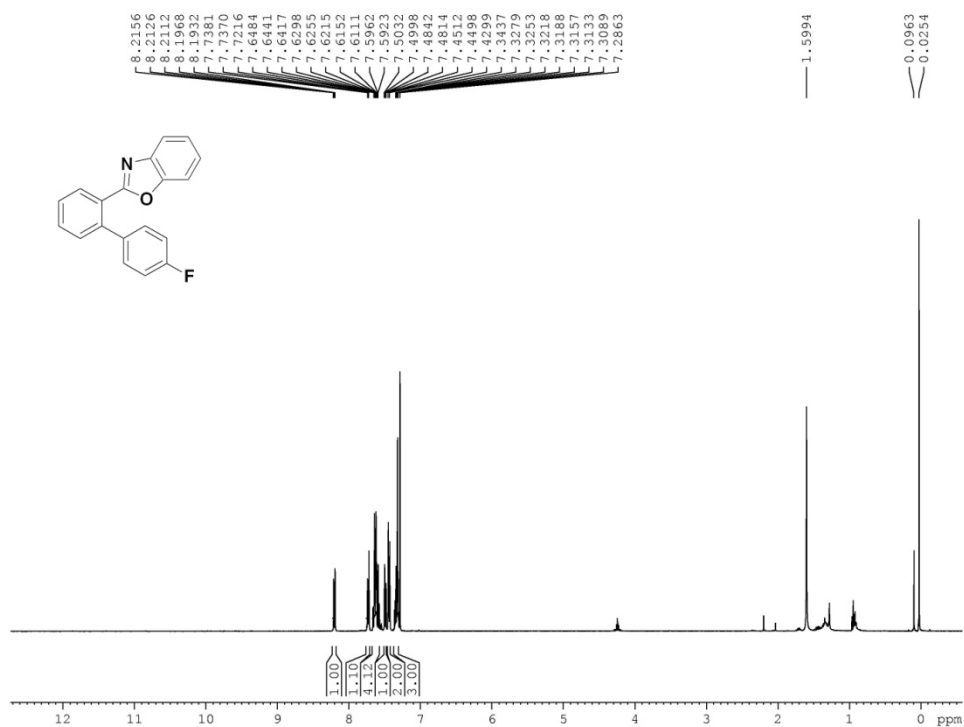

### <sup>13</sup>C NMR of 2-(4'-Fluoro-biphenyl-2-yl)-benzoxazole 3j (Scheme 1):-

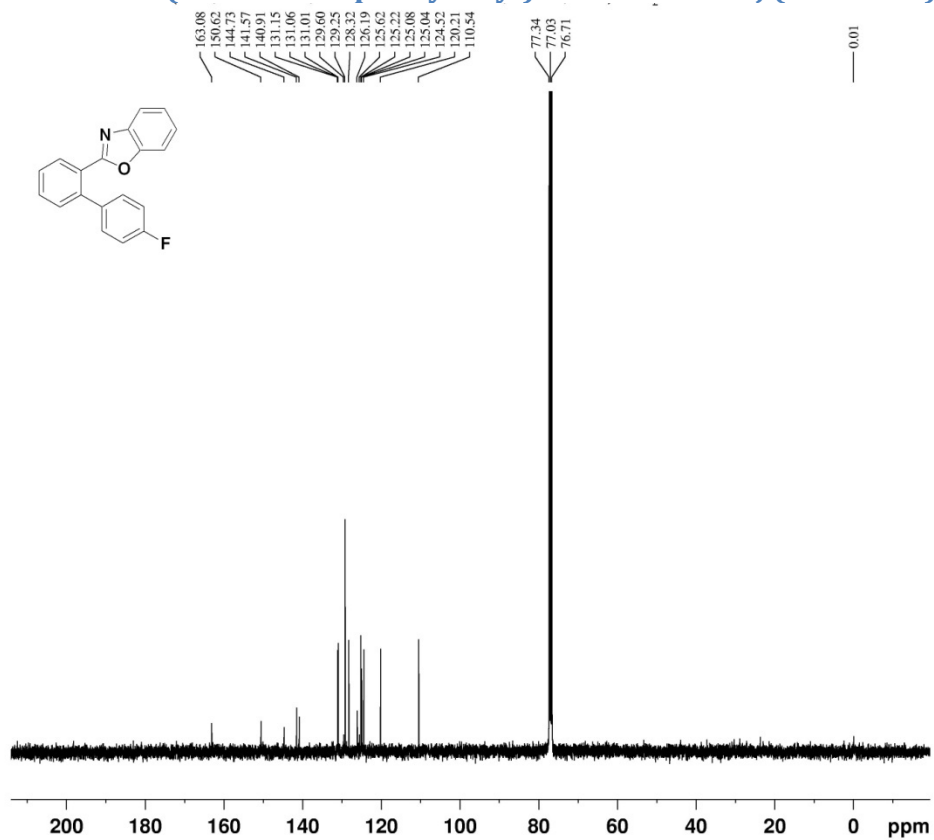

**<sup>1</sup>H NMR of 2-(4'-Trifluoromethyl-biphenyl-2-yl)-benzoxazole 3k (Scheme 1):-**

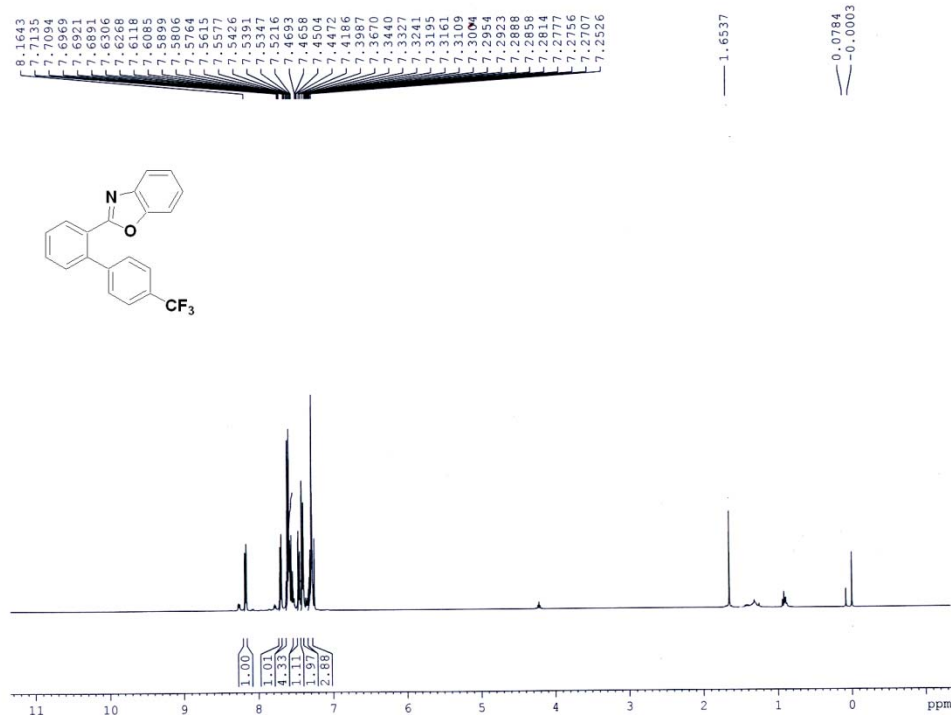

**<sup>13</sup>C NMR of 2-(4'-Trifluoromethyl-biphenyl-2-yl)-benzoxazole 3k (Scheme 1):-**

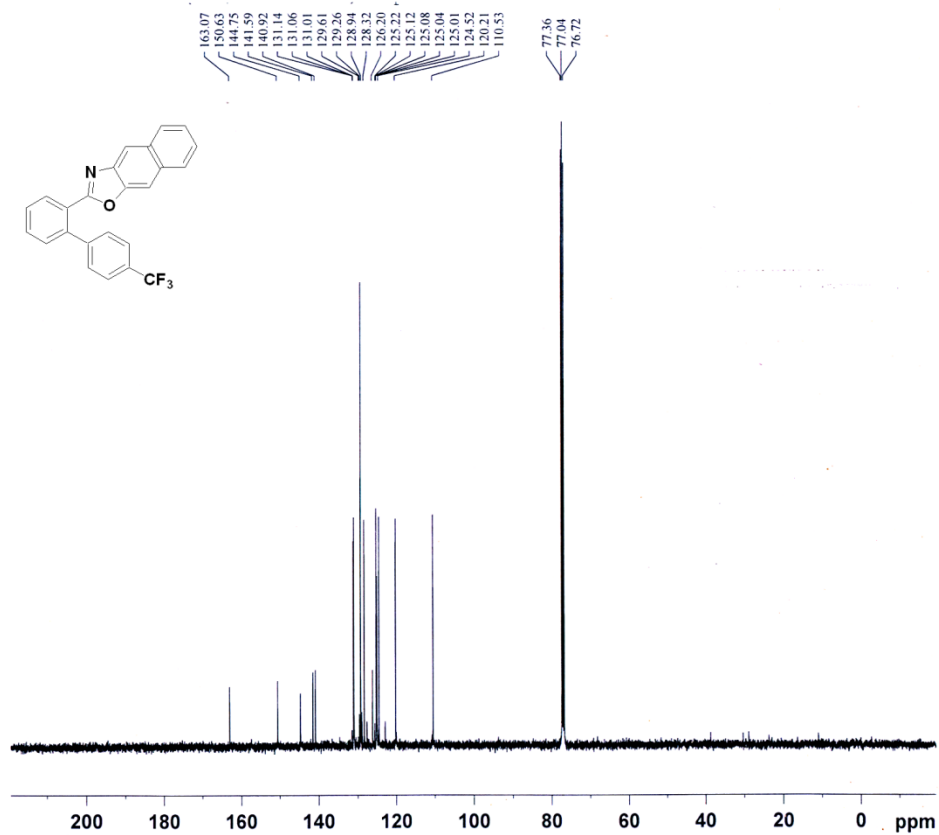

**<sup>1</sup>H NMR of 2'-Benzoxazol-2-yl-biphenyl-4-carbaldehyde 3I (Scheme 1):-**

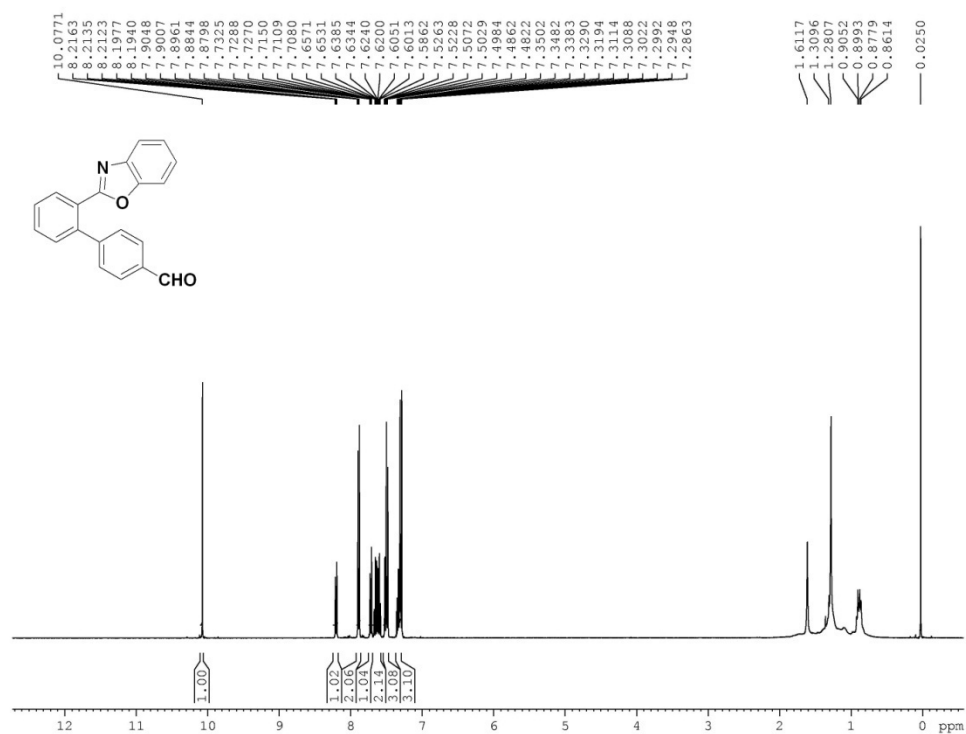

**<sup>13</sup>C NMR of 2'-Benzoxazol-2-yl-biphenyl-4-carbaldehyde 3I (Scheme 1):-**

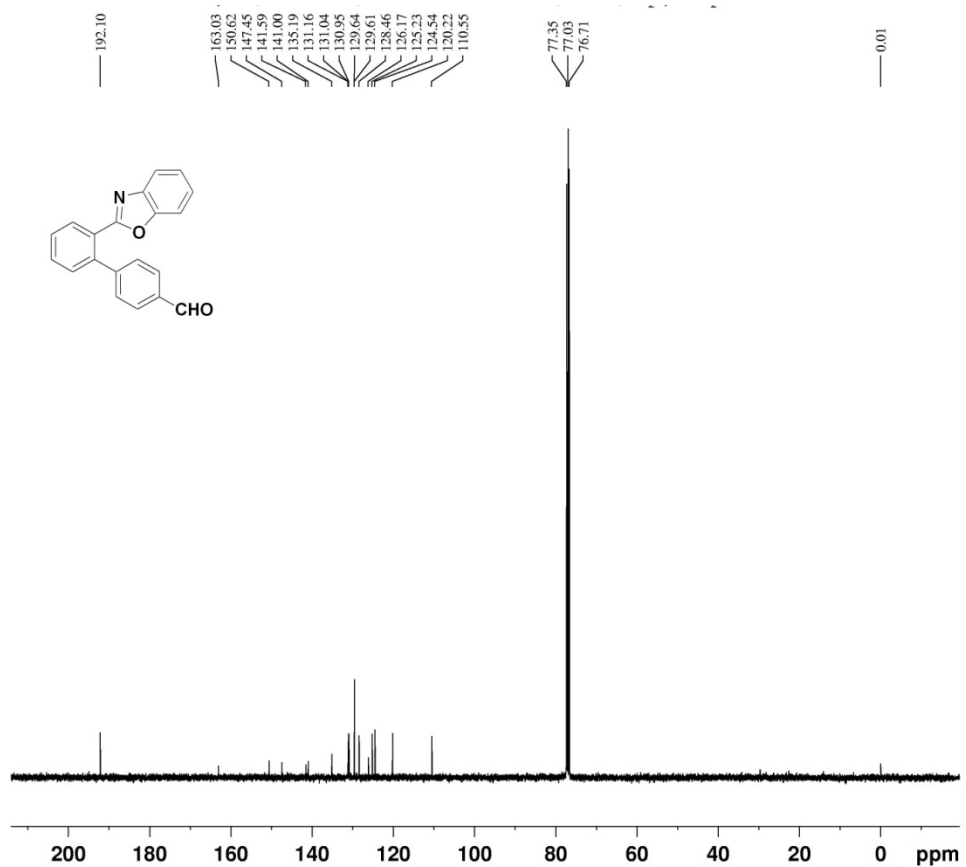

### <sup>1</sup>H NMR of 2'-Benzoxazol-2-yl-biphenyl-4-carbonitrile 3m (Scheme 1):-

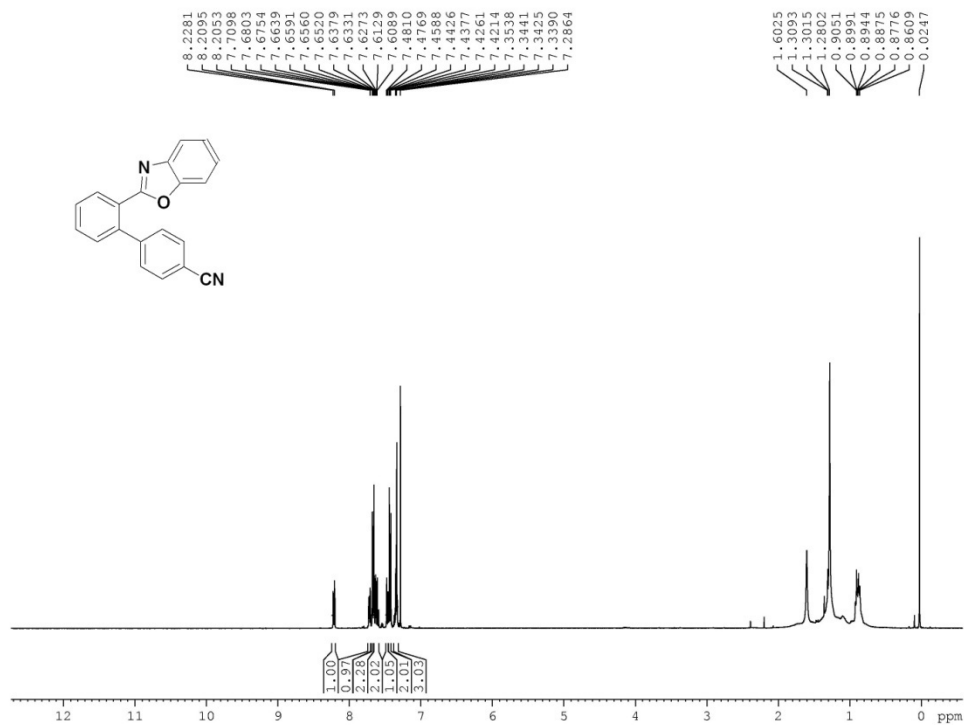

### <sup>13</sup>C NMR of 2'-Benzoxazol-2-yl-biphenyl-4-carbonitrile 3m (Scheme 1):-



**<sup>1</sup>H NMR of 2-(4'-Methanesulfonyl-biphenyl-2-yl)-benzoxazole 3o (Scheme 2):-**

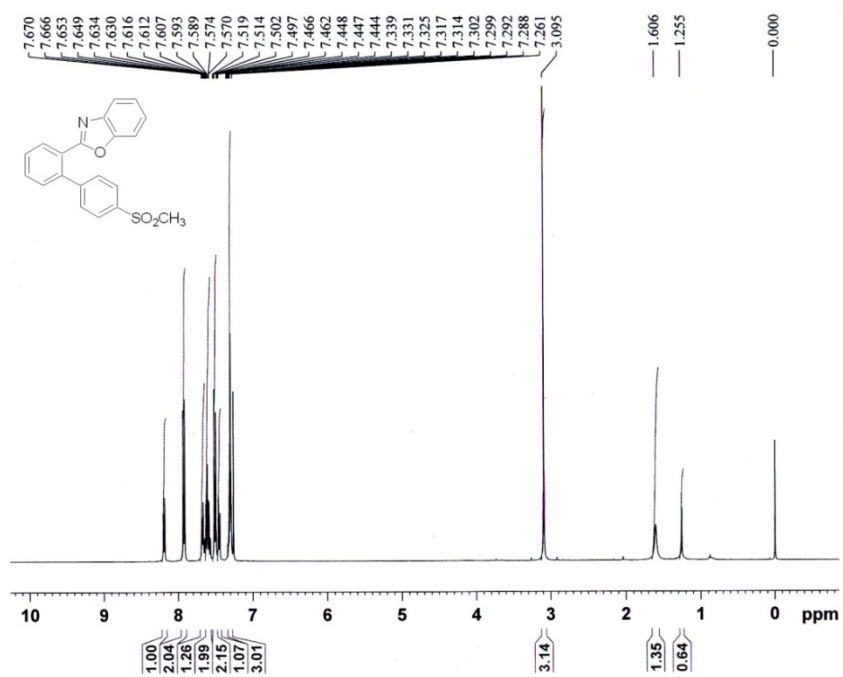

**<sup>13</sup>C NMR of 2-(4'-Methanesulfonyl-biphenyl-2-yl)-benzoxazole 3o (Scheme 2):-**

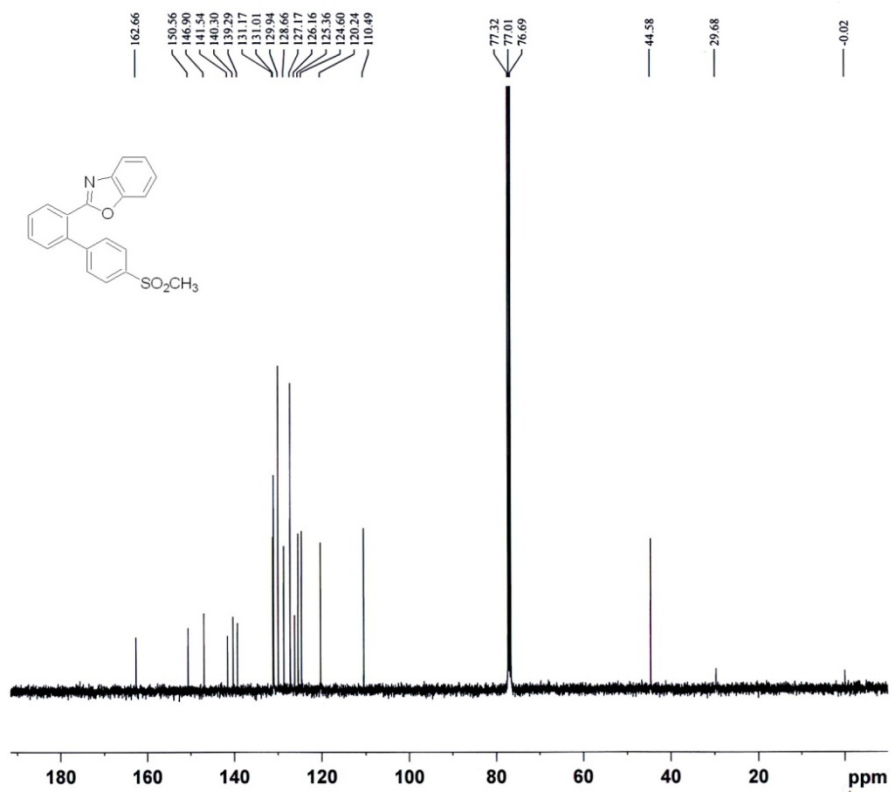

**<sup>1</sup>H NMR of 2'-Benzoxazol-2-yl-3-chloro-biphenyl-4-ol 3n (Scheme 2):-**

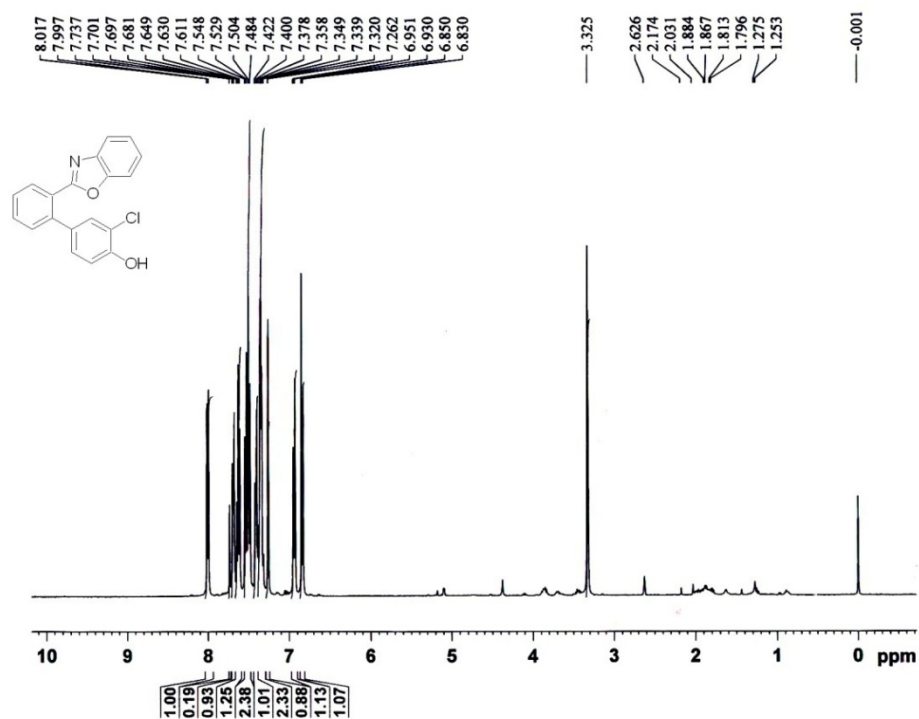

**<sup>13</sup>C NMR of 2'-Benzoxazol-2-yl-3-chloro-biphenyl-4-ol 3n (Scheme 2):-**

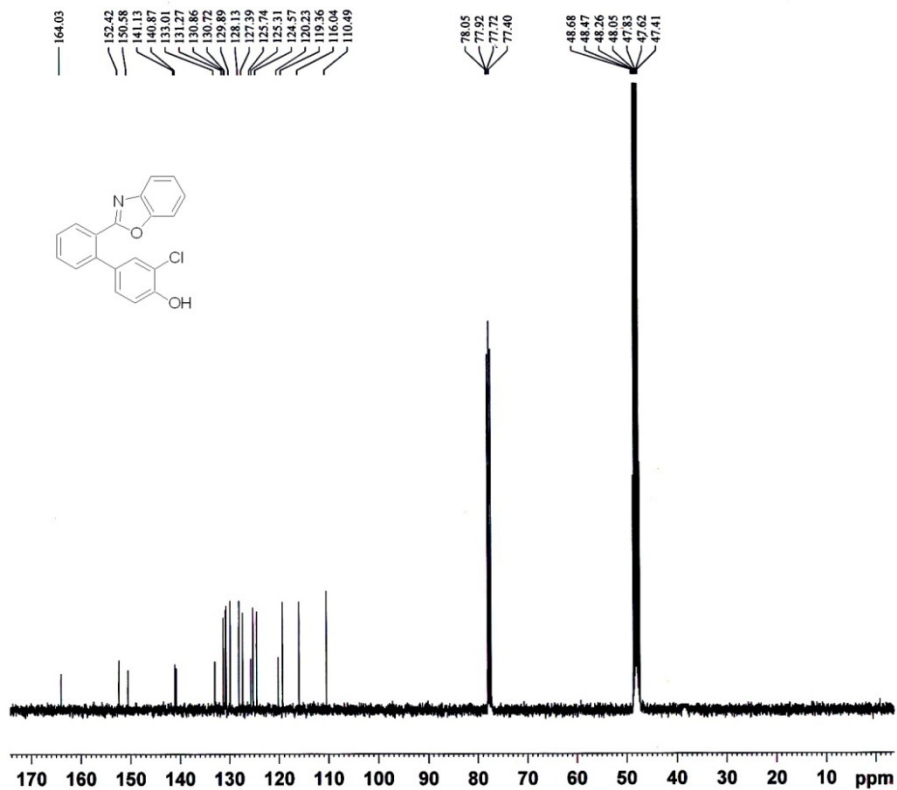



# Scanned HPLC Spectra to Determine the Purity of Compounds

## HPLC of 2-Biphenyl-2-yl-benzoxazole 3a (Scheme 1):-

E:\B Pujala\Kapil\KS-314A1.lcd

Acquired by : Admin  
Sample Name : KS-314A  
Sample ID : KS-314A  
Vail # : 32  
Injection Volume : 10 uL  
Data File Name : KS-314A1.lcd  
Method File Name : COAN1.lcm  
Batch File Name :  
Report File Name : Default.lcr  
Data Acquired : 4/8/2012 9:27:20 PM  
Data Processed : 4/8/2012 10:12:22 PM

### <Chromatogram>

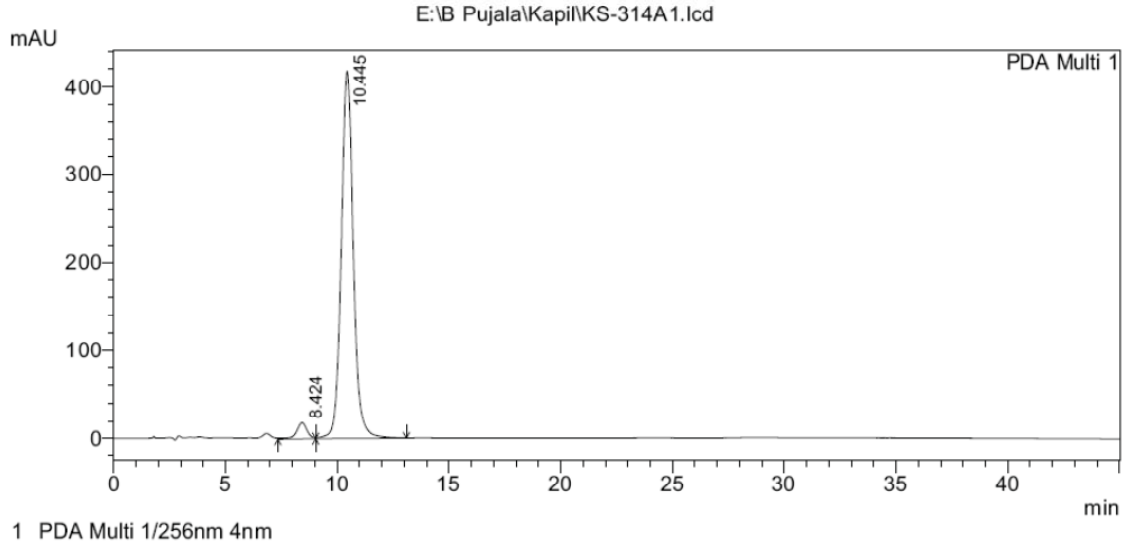

PeakTable

PDA Ch1 256nm 4nm

| Peak# | Ret. Time | Area     | Height | Area %  | Height % |
|-------|-----------|----------|--------|---------|----------|
| 1     | 8.424     | 613853   | 18503  | 3.759   | 4.241    |
| 2     | 10.445    | 15714980 | 417780 | 96.241  | 95.759   |
| Total |           | 16328833 | 436283 | 100.000 | 100.000  |

## HPLC of 2-(4'-Methoxy-biphenyl-2-yl)-benzoxazole 3b (Scheme 1):-

E:\B Pujala\Kapi\KS-309.lcd

Acquired by : Admin  
 Sample Name : KS-309  
 Sample ID : KS-309  
 Vial # : 31  
 Injection Volume : 10 uL  
 Data File Name : KS-309.lcd  
 Method File Name : COAN1.lcm  
 Batch File Name :  
 Report File Name : Default.lcr  
 Data Acquired : 4/8/2012 6:37:13 PM  
 Data Processed : 4/8/2012 7:22:16 PM

### <Chromatogram>

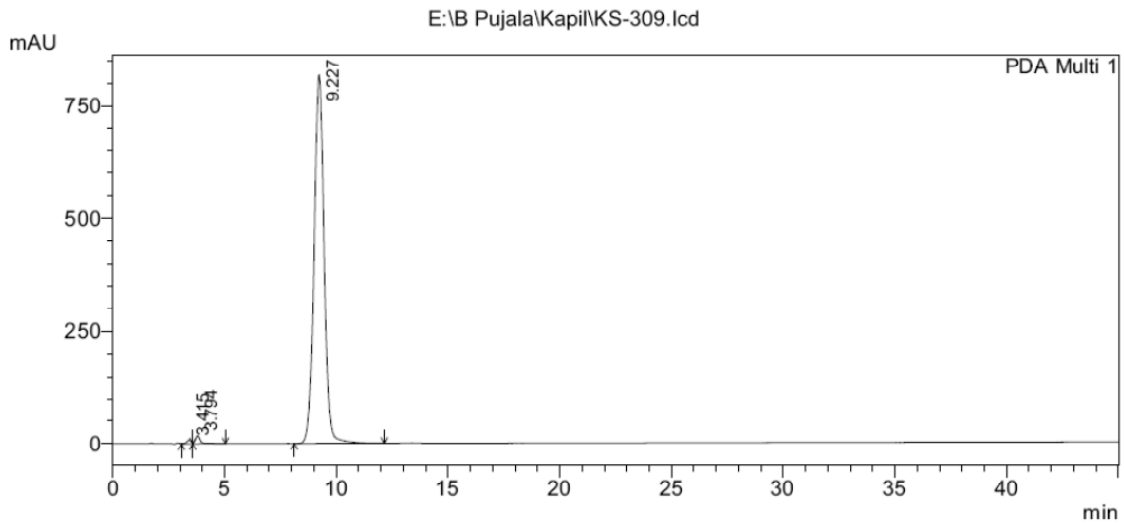

PeakTable

PDA Ch1 256nm 4nm

| Peak# | Ret. Time | Area     | Height | Area %  | Height % |
|-------|-----------|----------|--------|---------|----------|
| 1     | 3.415     | 132095   | 8838   | 0.509   | 1.048    |
| 2     | 3.794     | 274031   | 17473  | 1.056   | 2.072    |
| 3     | 9.227     | 25550927 | 817160 | 98.435  | 96.881   |
| Total |           | 25957053 | 843471 | 100.000 | 100.000  |

## HPLC of 2-(3',4'-Dimethoxy-biphenyl-2-yl)-benzoxazole 3c (Scheme 1):-

E:\B Pujala\Kapil\KS-310.lcd

Acquired by : Admin  
 Sample Name : KS-310  
 Sample ID : KS-310  
 Vial # : 36  
 Injection Volume : 10 uL  
 Data File Name : KS-310.lcd  
 Method File Name : COAN1.lcm  
 Batch File Name :  
 Report File Name : Default.lcr  
 Data Acquired : 4/9/2012 12:23:36 PM  
 Data Processed : 4/9/2012 1:08:39 PM

### <Chromatogram>

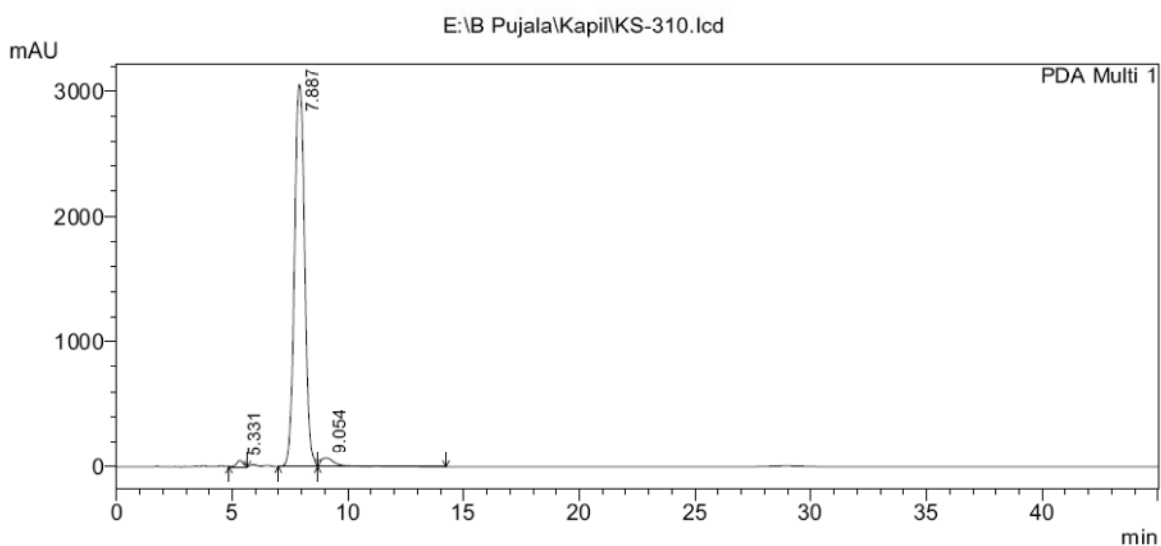

PeakTable

PDA Ch1 256nm 4nm

| Peak# | Ret. Time | Area     | Height  | Area %  | Height % |
|-------|-----------|----------|---------|---------|----------|
| 1     | 5.331     | 1018910  | 51212   | 1.031   | 1.612    |
| 2     | 7.887     | 94291851 | 3054643 | 95.399  | 96.164   |
| 3     | 9.054     | 3528292  | 70645   | 3.570   | 2.224    |
| Total |           | 98839053 | 3176499 | 100.000 | 100.000  |

## HPLC of 2-(2',3'-Dimethoxy-biphenyl-2-yl)-benzoxazole 3d (Scheme 1):-

E:\B Pujala\Kapil\KS-308.lcd

Acquired by : Admin  
Sample Name : KS-308  
Sample ID : KS-308  
Vial # : 35  
Injection Volume : 10 uL  
Data File Name : KS-308.lcd  
Method File Name : COAN1.lcm  
Batch File Name :  
Report File Name : Default.lcr  
Data Acquired : 4/9/2012 11:31:57 AM  
Data Processed : 4/9/2012 12:17:01 PM

### <Chromatogram>

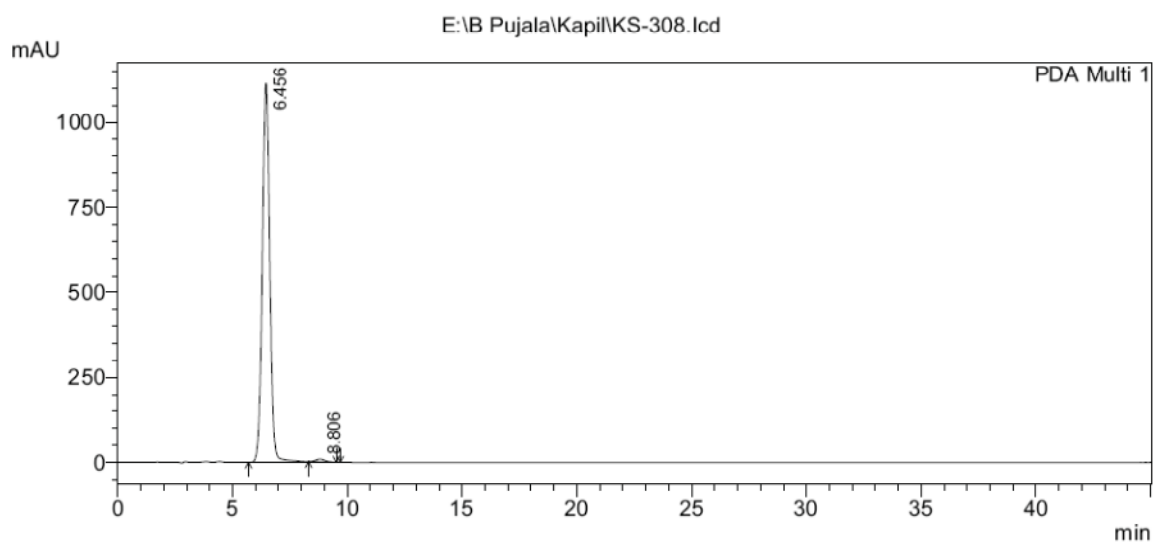

1 PDA Multi 1/256nm 4nm

PeakTable

PDA Ch1 256nm 4nm

| Peak# | Ret. Time | Area     | Height  | Area %  | Height % |
|-------|-----------|----------|---------|---------|----------|
| 1     | 6.456     | 25444160 | 1114988 | 99.130  | 99.283   |
| 2     | 8.806     | 223290   | 8055    | 0.870   | 0.717    |
| Total |           | 25667450 | 1123043 | 100.000 | 100.000  |

## HPLC of 2-(3'-Cyclopentyloxy-4'-methoxy-biphenyl-2-yl)-benzoxazole 3e (Scheme 1):-

E:\B Pujala\Kapil\KS-303.lcd

```

Acquired by      : Admin
Sample Name     : KS-303
Sample ID      : KS-303
Vial #         : 39
Injection Volume : 10 uL
Data File Name  : KS-303.lcd
Method File Name : COAN1.lcm
Batch File Name :
Report File Name : Default.lcr
Data Acquired   : 4/9/2012 3:31:56 PM
Data Processed  : 4/9/2012 4:17:01 PM
    
```

### <Chromatogram>

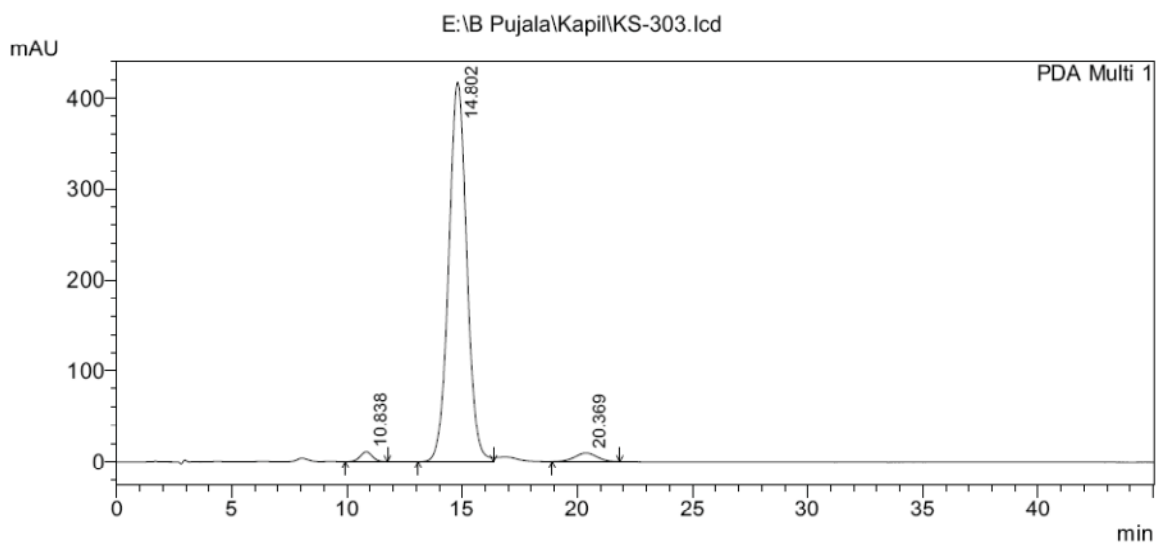

1 PDA Multi 1/256nm 4nm

PeakTable

| PDA Ch1 256nm 4nm |           |          |        |         |          |
|-------------------|-----------|----------|--------|---------|----------|
| Peak#             | Ret. Time | Area     | Height | Area %  | Height % |
| 1                 | 10.838    | 391709   | 10491  | 1.659   | 2.403    |
| 2                 | 14.802    | 22612096 | 417005 | 95.758  | 95.511   |
| 3                 | 20.369    | 609970   | 9108   | 2.583   | 2.086    |
| Total             |           | 23613775 | 436604 | 100.000 | 100.000  |

## HPLC of 2-(4'-Methylsulfonyl-biphenyl-2-yl)-benzoxazole 3f (Scheme 1):-

E:\B Pujala\Kapil\KS-305C1.lcd

Acquired by : Admin  
 Sample Name : KS-305C  
 Sample ID : KS-305C  
 Vail # : 30  
 Injection Volume : 10 uL  
 Data File Name : KS-305C1.lcd  
 Method File Name : COAN1.lcm  
 Batch File Name :  
 Report File Name : Default.lcr  
 Data Acquired : 4/8/2012 5:39:58 PM  
 Data Processed : 4/8/2012 6:25:01 PM

### <Chromatogram>

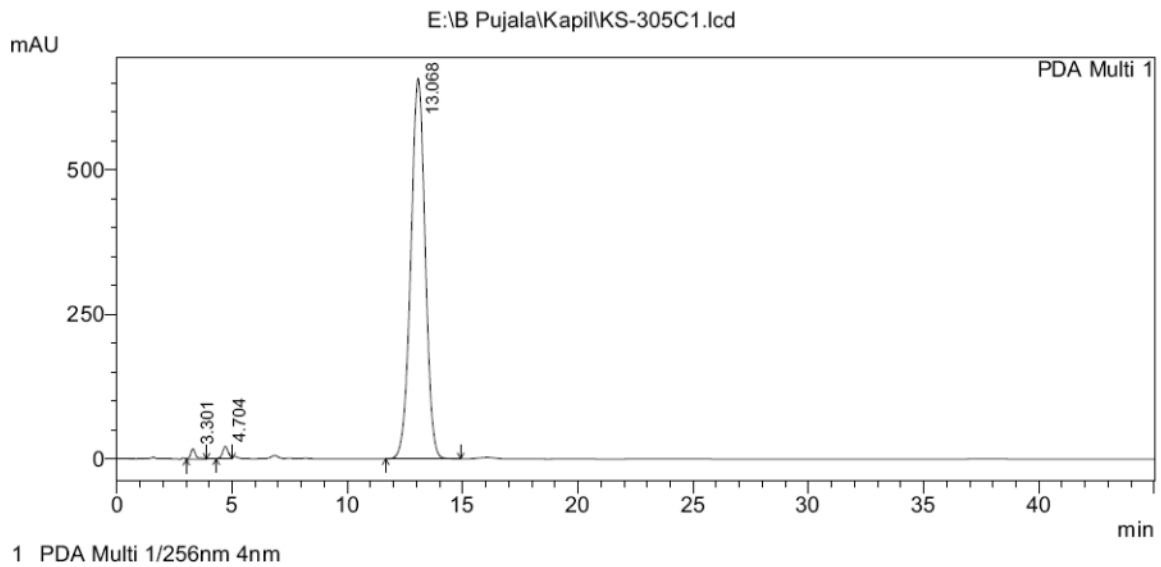

PeakTable

PDA Ch1 256nm 4nm

| Peak# | Ret. Time | Area     | Height | Area %  | Height % |
|-------|-----------|----------|--------|---------|----------|
| 1     | 3.301     | 287226   | 18001  | 0.984   | 2.577    |
| 2     | 4.704     | 374155   | 21575  | 1.281   | 3.088    |
| 3     | 13.068    | 28541938 | 659078 | 97.735  | 94.335   |
| Total |           | 29203320 | 698655 | 100.000 | 100.000  |

## HPLC of 2-(3'-Chloro-4'-methoxy-biphenyl-2-yl)-benzoxazole 3g (Scheme 1):-

Shimadzu CLASS-VP V6.14 SP1

Area % Report

Page 1 of 1

Method Name: C:\CLASS-VP\untitled.met

Data Name: I:\KApil Seth\KS-SKG-4OMe

User: System

Acquired: 4/12/2012 10:38:02 AM

Printed: 10/26/2013 12:37:19 PM

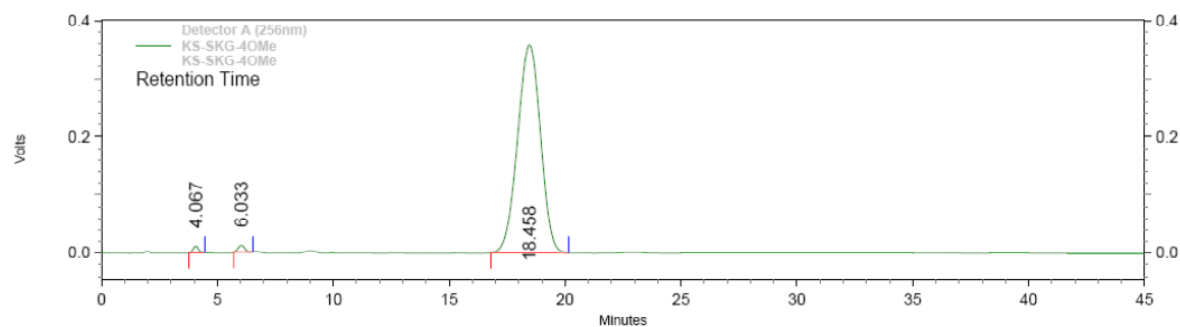

### Detector A (256nm)

| Pk # | Retention Time | Area     | Area % |
|------|----------------|----------|--------|
| 1    | 4.067          | 180423   | 0.723  |
| 2    | 6.033          | 237314   | 0.951  |
| 3    | 18.458         | 24543688 | 98.326 |

|        |  |          |         |
|--------|--|----------|---------|
| Totals |  | 24961425 | 100.000 |
|--------|--|----------|---------|

## HPLC of 2-(3'-Chloro-4'-isopropoxy-biphenyl-2-yl)-benzoxazole 3h (Scheme 1):-

E:\B Pujala\Kapi\KS-312.lcd

Acquired by : Admin  
 Sample Name : KS-312  
 Sample ID : KS-312  
 Vial # : 33  
 Injection Volume : 10 uL  
 Data File Name : KS-312.lcd  
 Method File Name : COAN1.lcm  
 Batch File Name :  
 Report File Name : Default.lcr  
 Data Acquired : 4/8/2012 10:15:41 PM  
 Data Processed : 4/8/2012 11:00:45 PM

### <Chromatogram>

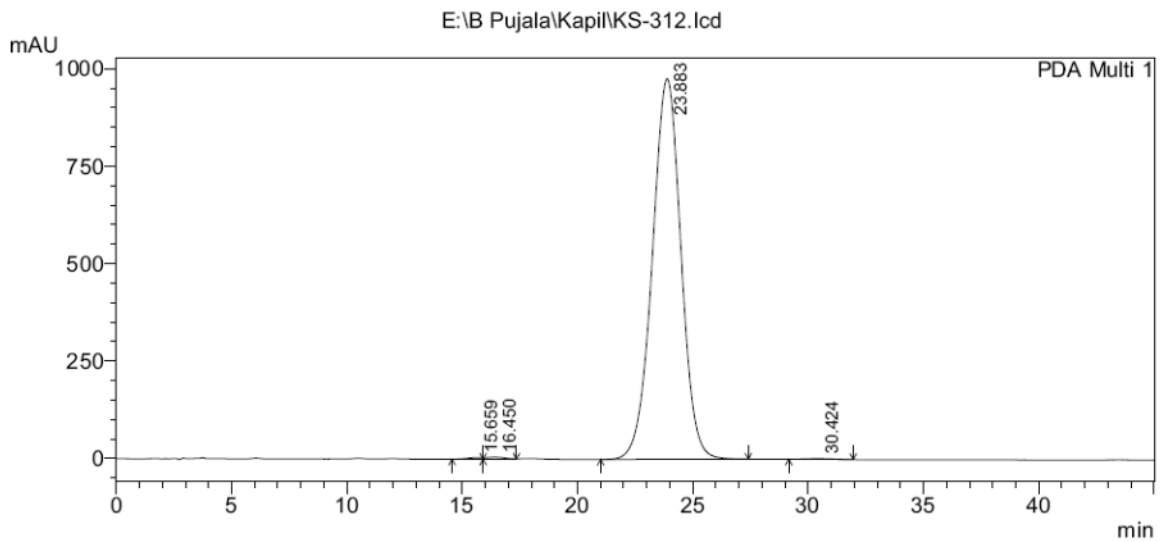

PeakTable

PDA Ch1 256nm 4nm

| Peak# | Ret. Time | Area     | Height | Area %  | Height % |
|-------|-----------|----------|--------|---------|----------|
| 1     | 15.659    | 179029   | 3919   | 0.211   | 0.397    |
| 2     | 16.450    | 303919   | 5109   | 0.358   | 0.518    |
| 3     | 23.883    | 84244025 | 975452 | 99.241  | 98.894   |
| 4     | 30.424    | 161129   | 1881   | 0.190   | 0.191    |
| Total |           | 84888103 | 986361 | 100.000 | 100.000  |



## HPLC of 2-(4'-Benzyloxy-3'-chloro-biphenyl-2-yl)-benzoxazole 3i (Scheme 1):-

E:\B Pujala\Kapil\KS-304.lcd

Acquired by : Admin  
 Sample Name : KS-304  
 Sample ID : KS-304  
 Vial # : 34  
 Injection Volume : 10 uL  
 Data File Name : KS-304.lcd  
 Method File Name : COAN1.lcm  
 Batch File Name :  
 Report File Name : Default.lcr  
 Data Acquired : 4/8/2012 11:03:41 PM  
 Data Processed : 4/8/2012 11:48:43 PM

### <Chromatogram>

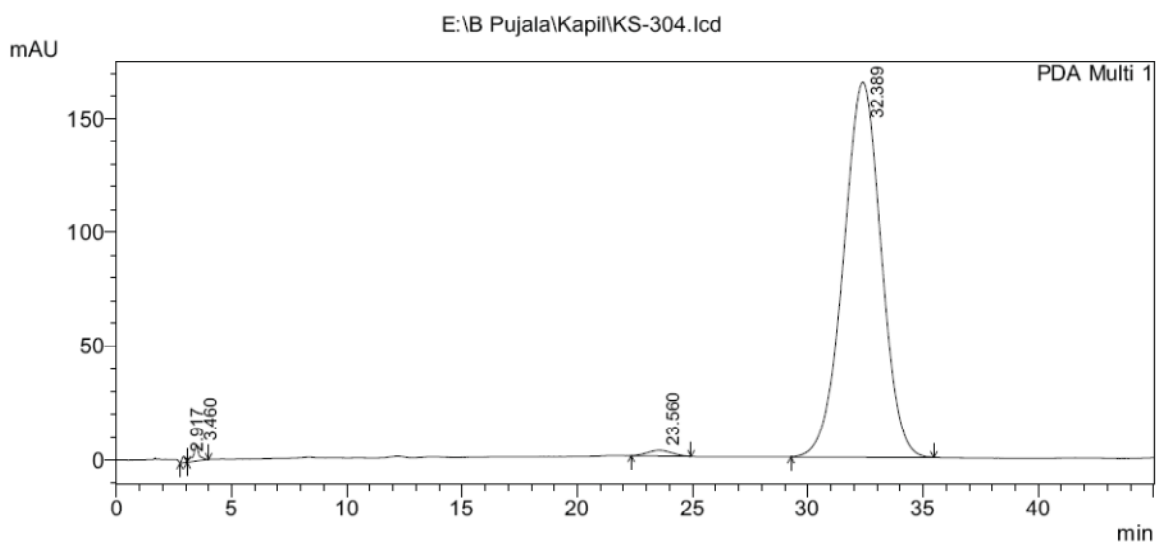

PeakTable

PDA Ch1 256nm 4nm

| Peak# | Ret. Time | Area     | Height | Area %  | Height % |
|-------|-----------|----------|--------|---------|----------|
| 1     | 2.917     | 32271    | 2714   | 0.169   | 1.536    |
| 2     | 3.460     | 116712   | 6606   | 0.612   | 3.739    |
| 3     | 23.560    | 176415   | 2404   | 0.925   | 1.361    |
| 4     | 32.389    | 18738025 | 164948 | 98.293  | 93.364   |
| Total |           | 19063423 | 176672 | 100.000 | 100.000  |

## HPLC of 2-(4'-Fluoro-biphenyl-2-yl)-benzoxazole 3j (Scheme 1):-

E:\B Pujala\Kapil\KS-315B1.lcd

Acquired by : Admin  
Sample Name : KS-315B  
Sample ID : KS-315B  
Vial # : 38  
Injection Volume : 10 uL  
Data File Name : KS-315B1.lcd  
Method File Name : COAN1.lcm  
Batch File Name :  
Report File Name : Default.lcr  
Data Acquired : 4/9/2012 2:38:43 PM  
Data Processed : 4/9/2012 3:23:48 PM

### <Chromatogram>

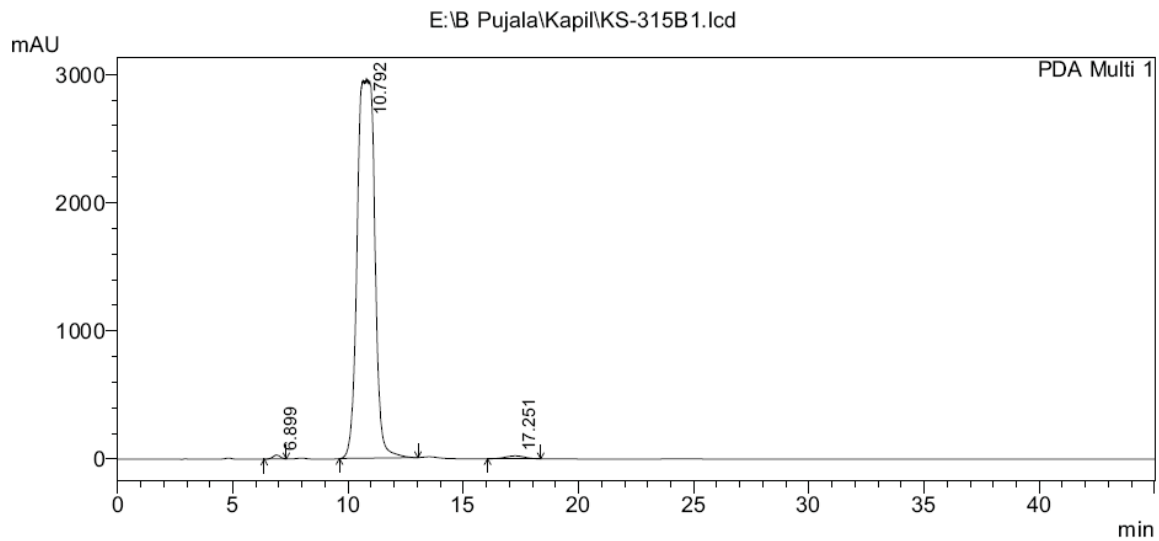

PeakTable

PDA Ch1 256nm 4nm

| Peak# | Ret. Time | Area      | Height  | Area %  | Height % |
|-------|-----------|-----------|---------|---------|----------|
| 1     | 6.899     | 652613    | 29977   | 0.411   | 0.994    |
| 2     | 10.792    | 156725242 | 2964514 | 98.769  | 98.260   |
| 3     | 17.251    | 1300302   | 22520   | 0.819   | 0.746    |
| Total |           | 158678157 | 3017011 | 100.000 | 100.000  |

## HPLC of 2-(4'-Trifluoromethyl-biphenyl-2-yl)-benzoxazole 3k (Scheme 1):-

E:\B Pujala\Kapi\KS-313.lcd

Acquired by : Admin  
Sample Name : KS-313  
Sample ID : KS-313  
Vial # : 37  
Injection Volume : 10 uL  
Data File Name : KS-313.lcd  
Method File Name : COAN1.lcm  
Batch File Name :  
Report File Name : Default.lcr  
Data Acquired : 4/9/2012 1:45:49 PM  
Data Processed : 4/9/2012 2:30:53 PM

### <Chromatogram>

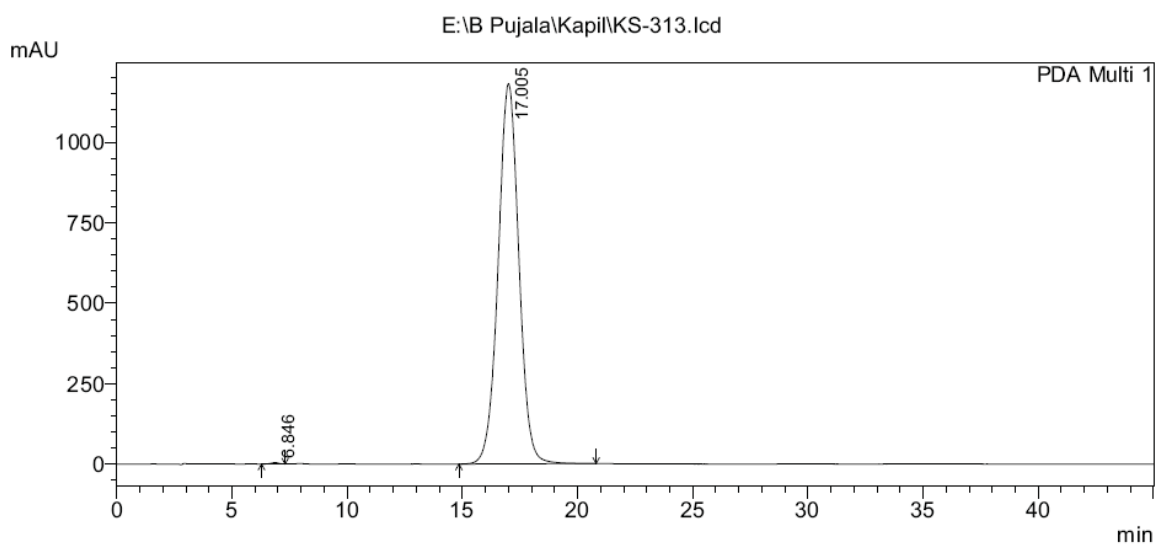

1 PDA Multi 1/256nm 4nm

PeakTable

PDA Ch1 256nm 4nm

| Peak# | Ret. Time | Area     | Height  | Area %  | Height % |
|-------|-----------|----------|---------|---------|----------|
| 1     | 6.846     | 98967    | 4265    | 0.134   | 0.360    |
| 2     | 17.005    | 73754620 | 1181853 | 99.866  | 99.640   |
| Total |           | 73853587 | 1186118 | 100.000 | 100.000  |

## HPLC of 2'-Benzoxazol-2-yl-biphenyl-4-carbaldehyde 3l (Scheme 1):-

Shimadzu CLASS-VP V6.12 SP3

Area % Report

Method Name: C:\CLASS-VP\untitled.met

Data Name: D:\class-vp\DATA\VSM\Kapil Seth\KS307

User: System

Acquired: 4/11/2012 8:25:59 PM

Printed: 4/13/2012 11:54:32 AM

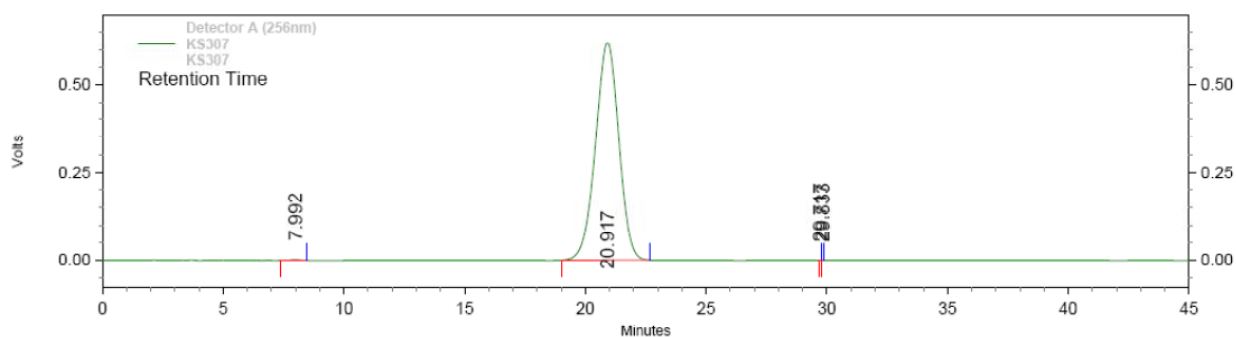

| Detector A (256nm) |                |          |         |        |          |
|--------------------|----------------|----------|---------|--------|----------|
| Pk #               | Retention Time | Area     | Area %  | Height | Height % |
| 1                  | 7.992          | 58843    | 0.141   | 2349   | 0.378    |
| 2                  | 20.917         | 41562589 | 99.858  | 618407 | 99.615   |
| 3                  | 29.717         | 63       | 0.000   | 22     | 0.004    |
| 4                  | 29.833         | 59       | 0.000   | 19     | 0.003    |
| Totals             |                | 41621554 | 100.000 | 620797 | 100.000  |

## HPLC of 2'-Benzoxazol-2-yl-biphenyl-4-carbonitrile 3m (Scheme 1):-

**Method Name:** C:\CLASS-VP\untitled.met  
**Data Name:** D:\class-vp\DATA\VSM\KApil Seth\KS306  
**User:** System  
**Acquired:** 4/11/2012 9:52:52 PM  
**Printed:** 4/13/2012 11:50:27 AM

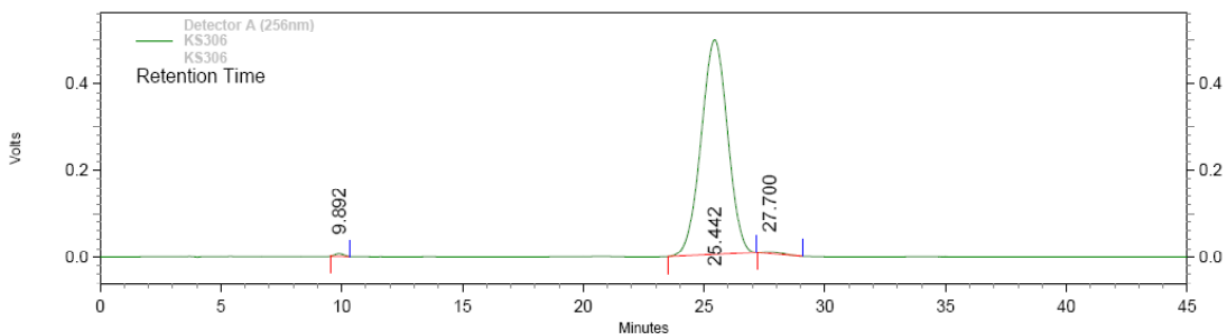

| Detector A (256nm) |                |          |         |        |          |
|--------------------|----------------|----------|---------|--------|----------|
| Pk #               | Retention Time | Area     | Area %  | Height | Height % |
| 1                  | 9.892          | 150716   | 0.395   | 6088   | 1.208    |
| 2                  | 25.442         | 37777155 | 99.028  | 493855 | 98.006   |
| 3                  | 27.700         | 220237   | 0.577   | 3962   | 0.786    |
| Totals             |                | 38148108 | 100.000 | 503905 | 100.000  |

## HPLC of 2-(4'-Methanesulfonyl-biphenyl-2-yl)-benzoxazole 3o (Scheme 2):-

Shimadzu CLASS-VP V6.12 SP3

Area % Report

Method Name: C:\CLASS-VP\untitled.met

Data Name: D:\class-vp\DATA\VSM\KApil Seth\KS-SKG-SO

User: System

Acquired: 4/12/2012 9:51:38 AM

Printed: 4/13/2012 12:15:31 PM

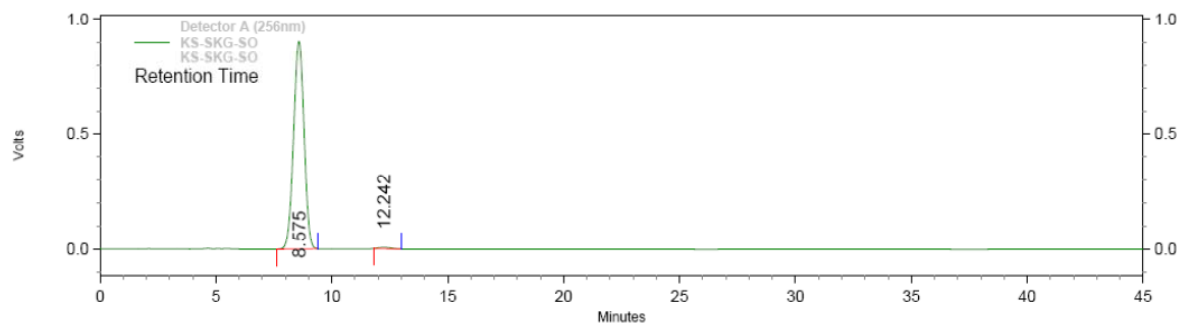

### Detector A (256nm)

| Pk #   | Retention Time | Area     | Area %  | Height | Height % |
|--------|----------------|----------|---------|--------|----------|
| 1      | 8.575          | 28499800 | 99.327  | 902763 | 99.419   |
| 2      | 12.242         | 193129   | 0.673   | 5278   | 0.581    |
| Totals |                | 28692929 | 100.000 | 908041 | 100.000  |

## HPLC of 2'-Benzoxazol-2-yl-3-chloro-biphenyl-4-ol 3n (Scheme 2):-

Shimadzu CLASS-VP V6.12 SP3

Area % Report

Method Name: C:\CLASS-VP\untitled.met  
 Data Name: D:\class-vp\DATA\VSM\KApil Seth\KS-SKG-4OH  
 User: System  
 Acquired: 4/12/2012 11:24:14 AM  
 Printed: 4/13/2012 12:04:32 PM

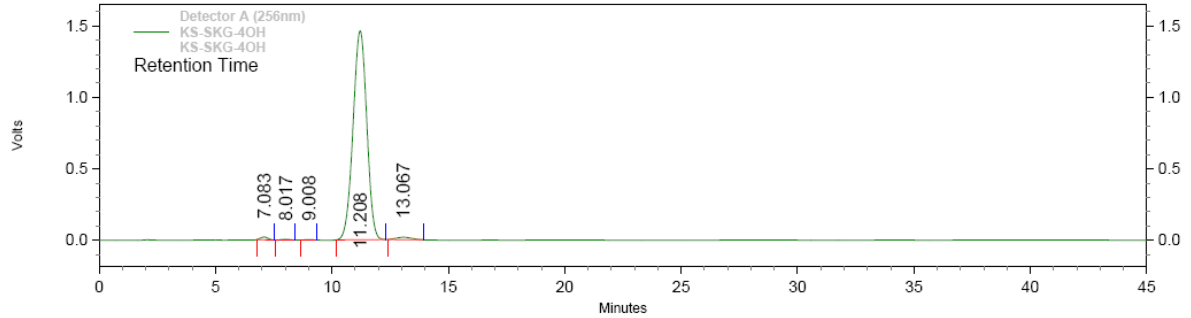

**Detector A (256nm)**

| Pk #   | Retention Time | Area     | Area %  | Height  | Height % |
|--------|----------------|----------|---------|---------|----------|
| 1      | 7.083          | 427543   | 0.698   | 19762   | 1.313    |
| 2      | 8.017          | 120556   | 0.197   | 4668    | 0.310    |
| 3      | 9.008          | 68552    | 0.112   | 2857    | 0.190    |
| 4      | 11.208         | 59864612 | 97.734  | 1460852 | 97.057   |
| 5      | 13.067         | 771214   | 1.259   | 17013   | 1.130    |
| Totals |                | 61252477 | 100.000 | 1505152 | 100.000  |

## References

1. Rimon, G.; Sidhu, R. S.; Lauver, D. A.; Lee J. Y.; Sharma, N. P.; Yuan, C.; Frieler, R. A.; Trievel, R. C.; Lucchesi, B. R.; Smith, W. L. Coxibs interfere with the action of aspirin by binding tightly to one monomer of cyclooxygenase-1. *Proc. Natl. Acad. Sci. USA* **2010**, *107*, 28-33.
2. Kurumbail, R. G.; Stevens, A. M.; Gierse, J. K.; McDonald, J. J.; Stegeman, R. A.; Pak, J. Y.; Glidehaus, D.; Miyashiro, J. M.; Penning, T. D.; Seibert, K.; Isakson, P. C.; Stallings, W. C. Structural basis for selective inhibition of cyclooxygenase-2 by anti-inflammatory agents. *Nature* **1996**, *384*, 644-688.
3. Jones, G.; Willett, P.; Glen, R. C.; Leach, A. R.; Taylor, R. Development and validation of a genetic algorithm for flexible docking. *J. Mol. Biol.* **1997**, *267*, 727-748.
4. Jones, G.; Willett, P.; Glen, R. C. Molecular recognition of receptor sites using a genetic algorithm with a description of desolvation. *J. Mol. Biol.* **1995**, *245*, 43-53.
5. Sato, H.; Shewchuk, L. M.; Tang, J. Prediction of multiple binding modes of the CDK2 inhibitors, anilinopyrazoles, using the automated docking programs GOLD, FlexX, and LigandFit: an evaluation of performance. *J. Chem. Inf. Model.* **2006**, *46*, 2552-2562.
6. Kumar, D.; Rudrawar, S.; Chakraborti, A. K. One-pot synthesis of 2-substituted benzoxazoles directly from carboxylic acids. *Aust. J. Chem.* **2008**, *61*, 881-887.
7. Hachiya, H.; Hirano, K.; Satoh, T.; Miura, M. Nickel-catalyzed direct arylation of azoles with aryl bromide. *Org. Lett.* **2009**, *11*, 1737-1740.
8. Catalog number 560131, Cayman chemical company, [www.caymanchem.com](http://www.caymanchem.com).
9. Winter, C. A.; Risley, E. A.; Nuss, G. W. Anti-inflammatory and antipyretic activities of indomethacin, 1-(*p*-chlorobenzoyl)-5-methoxy-2-methylindole-3-acetic acid. *Pharmacol. Exp. Ther.* **1963**, *141*, 369-376.
10. Wang, J. L.; Carter, J.; Kiefer, J. R.; Kurumbail, R. G.; Pawlitz, J. L.; Brown, D.; Hartmann, S. J.; Graneto, M. J.; Seibert, K.; Talley, J. J. The novel benzopyran class of selective cyclooxygenase-2 inhibitors-part I: The first clinical candidate. *Bioorg. Med. Chem. Lett.* **2010**, *20*, 7155-7158.
